# Supplementary material for: Characteristics of Extracellular Vesicles Released by the Pathogenic Yeast-Like Fungi Candida glabrata, Candida parapsilosis and Candida tropicalis
Source: MDPI journal article supplement (doi:10.3390/cells9071722), 2020-07-18
Supplement: s1 [file s1]

**Supplementary Table 1.** Mass spectrometry identification of *C. glabrata* proteins in EVs after vesicle surface shaving with trypsin, vesicle sonication, or the preparation of fractions enriched with membrane proteins.

The resulting peptides were analyzed using the Dionex Ultimate 3000 UHPLC system coupled to an HCTUltra ETDII mass spectrometer and the obtained lists of peaks were searched against the NCBI protein database using an in-house Mascot server.

| Accession number                      | Protein                                                 | Molecular mass [Da] | Score | Matches | Sequences | Sequence coverage [%] |
|---------------------------------------|---------------------------------------------------------|---------------------|-------|---------|-----------|-----------------------|
| <b>surface shaving with trypsin 1</b> |                                                         |                     |       |         |           |                       |
| gi 50292035                           | hypothetical protein [ <i>Candida glabrata</i> CBS 138] | 136648              | 825   | 27      | 21        | 20                    |
| gi 50294560                           | hypothetical protein [ <i>Candida glabrata</i> CBS 138] | 62152               | 595   | 14      | 12        | 28                    |
| gi 50289857                           | hypothetical protein [ <i>Candida glabrata</i> CBS 138] | 46767               | 595   | 12      | 10        | 28                    |
| gi 50293403                           | hypothetical protein [ <i>Candida glabrata</i> CBS 138] | 44704               | 590   | 13      | 13        | 35                    |
| gi 50284959                           | hypothetical protein [ <i>Candida glabrata</i> CBS 138] | 93783               | 572   | 9       | 9         | 13                    |
| gi 50288681                           | hypothetical protein [ <i>Candida glabrata</i> CBS 138] | 35985               | 563   | 13      | 10        | 33                    |
| gi 50286669                           | hypothetical protein [ <i>Candida glabrata</i> CBS 138] | 59098               | 546   | 17      | 9         | 23                    |
| gi 50289685                           | hypothetical protein [ <i>Candida glabrata</i> CBS 138] | 51468               | 475   | 14      | 13        | 29                    |
| gi 50294908                           | hypothetical protein [ <i>Candida glabrata</i> CBS 138] | 54975               | 465   | 13      | 11        | 26                    |
| gi 50295024                           | hypothetical protein [ <i>Candida glabrata</i> CBS 138] | 53878               | 402   | 7       | 7         | 20                    |
| gi 50287897                           | hypothetical protein [ <i>Candida glabrata</i> CBS 138] | 39767               | 367   | 7       | 7         | 27                    |
| gi 50292739                           | acetate-CoA ligase [ <i>Candida glabrata</i> CBS 138]   | 79670               | 352   | 7       | 7         | 10                    |
| gi 50291073                           | hypothetical protein [ <i>Candida glabrata</i> CBS 138] | 37779               | 288   | 8       | 5         | 20                    |

|              |                                                                    |       |     |   |   |    |
|--------------|--------------------------------------------------------------------|-------|-----|---|---|----|
| gi 50290317  | hypothetical protein [ <i>Candida glabrata</i> CBS 138]            | 37920 | 254 | 5 | 5 | 14 |
| gi 50289283  | hypothetical protein [ <i>Candida glabrata</i> CBS 138]            | 42203 | 209 | 3 | 3 | 9  |
| gi 50284865  | hypothetical protein [ <i>Candida glabrata</i> CBS 138]            | 62304 | 199 | 4 | 3 | 10 |
| gi 50288687  | hypothetical protein [ <i>Candida glabrata</i> CBS 138]            | 49013 | 187 | 4 | 4 | 9  |
| gi 50289307  | hypothetical protein [ <i>Candida glabrata</i> CBS 138]            | 60942 | 183 | 4 | 4 | 9  |
| gi 50291585  | hypothetical protein [ <i>Candida glabrata</i> CBS 138]            | 72055 | 158 | 3 | 3 | 5  |
| gi 50284869  | hypothetical protein [ <i>Candida glabrata</i> CBS 138]            | 30312 | 154 | 4 | 4 | 10 |
| gi 50285099  | hypothetical protein [ <i>Candida glabrata</i> CBS 138]            | 54057 | 145 | 2 | 2 | 6  |
| gi 9650673   | actin [ <i>Candida glabrata</i> ]                                  | 36600 | 144 | 3 | 3 | 10 |
| gi 18073449  | GAS-1 homologue [ <i>Candida glabrata</i> ]                        | 60675 | 141 | 3 | 3 | 4  |
| gi 50287951  | 60S acidic ribosomal protein P0 [ <i>Candida glabrata</i> CBS 138] | 33572 | 133 | 3 | 3 | 14 |
| gi 50287419  | hypothetical protein [ <i>Candida glabrata</i> CBS 138]            | 57350 | 131 | 2 | 2 | 5  |
| gi 50286375  | hypothetical protein [ <i>Candida glabrata</i> CBS 138]            | 42980 | 95  | 3 | 2 | 9  |
| gi 50294171  | hypothetical protein [ <i>Candida glabrata</i> CBS 138]            | 30205 | 87  | 2 | 2 | 11 |
| gi 50286153  | hypothetical protein [ <i>Candida glabrata</i> CBS 138]            | 30297 | 84  | 2 | 2 | 6  |
| gi 50290013  | hypothetical protein [ <i>Candida glabrata</i> CBS 138]            | 44930 | 81  | 2 | 2 | 4  |
| gi 50285355  | hypothetical protein [ <i>Candida glabrata</i> CBS 138]            | 36811 | 75  | 1 | 1 | 4  |
| gi 50292893  | hypothetical protein [ <i>Candida glabrata</i> CBS 138]            | 39503 | 72  | 3 | 3 | 6  |
| gi 50285407  | hypothetical protein [ <i>Candida glabrata</i> CBS 138]            | 29899 | 72  | 3 | 3 | 13 |
| gi 302309608 | hypothetical protein [ <i>Candida glabrata</i> CBS 138]            | 66558 | 69  | 2 | 2 | 3  |
| gi 50294606  | hypothetical protein [ <i>Candida glabrata</i> CBS 138]            | 34283 | 66  | 2 | 2 | 8  |

|                                       |                                                             |        |     |    |    |    |
|---------------------------------------|-------------------------------------------------------------|--------|-----|----|----|----|
| gi 50289515                           | 60S ribosomal protein L1 [ <i>Candida glabrata</i> CBS 138] | 24636  | 65  | 3  | 2  | 11 |
| gi 50294608                           | hypothetical protein [ <i>Candida glabrata</i> CBS 138]     | 22145  | 59  | 1  | 1  | 7  |
| gi 50292597                           | hypothetical protein [ <i>Candida glabrata</i> CBS 138]     | 20962  | 55  | 2  | 2  | 7  |
| gi 50294025                           | hypothetical protein [ <i>Candida glabrata</i> CBS 138]     | 43265  | 55  | 1  | 1  | 2  |
| gi 50294400                           | hypothetical protein [ <i>Candida glabrata</i> CBS 138]     | 77546  | 54  | 1  | 1  | 1  |
| <b>surface shaving with trypsin 2</b> |                                                             |        |     |    |    |    |
| gi 50294908                           | hypothetical protein [ <i>Candida glabrata</i> CBS 138]     | 54975  | 640 | 14 | 12 | 29 |
| gi 50293403                           | hypothetical protein [ <i>Candida glabrata</i> CBS 138]     | 44704  | 622 | 12 | 12 | 35 |
| gi 50284959                           | hypothetical protein [ <i>Candida glabrata</i> CBS 138]     | 93783  | 576 | 12 | 11 | 15 |
| gi 50292035                           | hypothetical protein [ <i>Candida glabrata</i> CBS 138]     | 136648 | 561 | 17 | 13 | 11 |
| gi 50288681                           | hypothetical protein [ <i>Candida glabrata</i> CBS 138]     | 35985  | 492 | 14 | 10 | 24 |
| gi 50289857                           | hypothetical protein [ <i>Candida glabrata</i> CBS 138]     | 46767  | 486 | 9  | 7  | 20 |
| gi 50292739                           | acetate-CoA ligase [ <i>Candida glabrata</i> CBS 138]       | 79670  | 472 | 11 | 9  | 13 |
| gi 50289685                           | hypothetical protein [ <i>Candida glabrata</i> CBS 138]     | 51468  | 420 | 12 | 11 | 29 |
| gi 25992752                           | pyruvate decarboxylase [ <i>Candida glabrata</i> ]          | 62011  | 410 | 9  | 7  | 15 |
| gi 50294560                           | hypothetical protein [ <i>Candida glabrata</i> CBS 138]     | 62152  | 410 | 9  | 7  | 15 |
| gi 50286669                           | hypothetical protein [ <i>Candida glabrata</i> CBS 138]     | 59098  | 407 | 12 | 6  | 14 |
| gi 50295024                           | hypothetical protein [ <i>Candida glabrata</i> CBS 138]     | 53878  | 320 | 5  | 5  | 16 |
| gi 50288687                           | hypothetical protein [ <i>Candida glabrata</i> CBS 138]     | 49013  | 311 | 8  | 7  | 16 |
| gi 50290013                           | hypothetical protein [ <i>Candida glabrata</i> CBS 138]     | 44930  | 246 | 5  | 5  | 16 |
| gi 50290317                           | hypothetical protein [ <i>Candida glabrata</i> CBS 138]     | 37920  | 193 | 5  | 4  | 13 |

|                                       |                                                                    |        |     |    |    |    |
|---------------------------------------|--------------------------------------------------------------------|--------|-----|----|----|----|
| gi 50287737                           | hypothetical protein [ <i>Candida glabrata</i> CBS 138]            | 21335  | 181 | 3  | 3  | 23 |
| gi 50291073                           | hypothetical protein [ <i>Candida glabrata</i> CBS 138]            | 37779  | 138 | 3  | 3  | 8  |
| gi 50284869                           | hypothetical protein [ <i>Candida glabrata</i> CBS 138]            | 30312  | 114 | 3  | 3  | 7  |
| gi 50287897                           | hypothetical protein [ <i>Candida glabrata</i> CBS 138]            | 39767  | 103 | 2  | 2  | 6  |
| gi 50287073                           | hypothetical protein [ <i>Candida glabrata</i> CBS 138]            | 27574  | 101 | 2  | 2  | 8  |
| gi 50286085                           | hypothetical protein [ <i>Candida glabrata</i> CBS 138]            | 74046  | 91  | 2  | 2  | 3  |
| gi 50289307                           | hypothetical protein [ <i>Candida glabrata</i> CBS 138]            | 60942  | 90  | 4  | 3  | 6  |
| gi 50292893                           | hypothetical protein [ <i>Candida glabrata</i> CBS 138]            | 39503  | 85  | 2  | 2  | 5  |
| gi 50285099                           | hypothetical protein [ <i>Candida glabrata</i> CBS 138]            | 54057  | 78  | 1  | 1  | 2  |
| gi 50289283                           | hypothetical protein [ <i>Candida glabrata</i> CBS 138]            | 42203  | 74  | 1  | 1  | 4  |
| gi 50287951                           | 60S acidic ribosomal protein P0 [ <i>Candida glabrata</i> CBS 138] | 33572  | 70  | 1  | 1  | 3  |
| gi 50288777                           | 40S ribosomal protein S5 [ <i>Candida glabrata</i> CBS 138]        | 25194  | 69  | 1  | 1  | 6  |
| gi 50285355                           | hypothetical protein [ <i>Candida glabrata</i> CBS 138]            | 36811  | 64  | 1  | 1  | 3  |
| gi 50289161                           | hypothetical protein [ <i>Candida glabrata</i> CBS 138]            | 38094  | 59  | 2  | 2  | 8  |
| gi 50292725                           | hypothetical protein [ <i>Candida glabrata</i> CBS 138]            | 80983  | 59  | 1  | 1  | 1  |
| gi 50287141                           | hypothetical protein [ <i>Candida glabrata</i> CBS 138]            | 55434  | 55  | 1  | 1  | 2  |
| <b>surface shaving with trypsin 3</b> |                                                                    |        |     |    |    |    |
| gi 50284959                           | hypothetical protein [ <i>Candida glabrata</i> CBS 138]            | 93783  | 611 | 13 | 13 | 17 |
| gi 50294908                           | hypothetical protein [ <i>Candida glabrata</i> CBS 138]            | 54975  | 568 | 14 | 11 | 29 |
| gi 50288681                           | hypothetical protein [ <i>Candida glabrata</i> CBS 138]            | 35985  | 535 | 15 | 12 | 38 |
| gi 50292035                           | hypothetical protein [ <i>Candida glabrata</i> CBS 138]            | 136648 | 511 | 20 | 12 | 10 |

|             |                                                                    |       |     |    |    |    |
|-------------|--------------------------------------------------------------------|-------|-----|----|----|----|
| gi 50286669 | hypothetical protein [ <i>Candida glabrata</i> CBS 138]            | 59098 | 480 | 14 | 8  | 18 |
| gi 25992752 | pyruvate decarboxylase [ <i>Candida glabrata</i> ]                 | 62011 | 375 | 9  | 8  | 14 |
| gi 50293403 | hypothetical protein [ <i>Candida glabrata</i> CBS 138]            | 44704 | 370 | 10 | 10 | 25 |
| gi 50295024 | hypothetical protein [ <i>Candida glabrata</i> CBS 138]            | 53878 | 327 | 6  | 5  | 14 |
| gi 50289857 | hypothetical protein [ <i>Candida glabrata</i> CBS 138]            | 46767 | 305 | 7  | 6  | 15 |
| gi 50292739 | acetate--CoA ligase [ <i>Candida glabrata</i> CBS 138]             | 79670 | 296 | 6  | 6  | 8  |
| gi 50289685 | hypothetical protein [ <i>Candida glabrata</i> CBS 138]            | 51468 | 293 | 7  | 6  | 14 |
| gi 50285355 | hypothetical protein [ <i>Candida glabrata</i> CBS 138]            | 36811 | 229 | 5  | 5  | 16 |
| gi 50287737 | hypothetical protein [ <i>Candida glabrata</i> CBS 138]            | 21335 | 227 | 3  | 3  | 23 |
| gi 50288687 | hypothetical protein [ <i>Candida glabrata</i> CBS 138]            | 49013 | 212 | 7  | 6  | 14 |
| gi 50287897 | hypothetical protein [ <i>Candida glabrata</i> CBS 138]            | 39767 | 184 | 3  | 3  | 10 |
| gi 50290317 | hypothetical protein [ <i>Candida glabrata</i> CBS 138]            | 37920 | 181 | 5  | 5  | 15 |
| gi 50284865 | hypothetical protein [ <i>Candida glabrata</i> CBS 138]            | 62304 | 168 | 3  | 3  | 7  |
| gi 50290013 | hypothetical protein [ <i>Candida glabrata</i> CBS 138]            | 44930 | 165 | 4  | 4  | 12 |
| gi 50292893 | hypothetical protein [ <i>Candida glabrata</i> CBS 138]            | 39503 | 147 | 3  | 3  | 7  |
| gi 50289283 | hypothetical protein [ <i>Candida glabrata</i> CBS 138]            | 42203 | 142 | 2  | 2  | 7  |
| gi 50284733 | hypothetical protein [ <i>Candida glabrata</i> CBS 138]            | 98941 | 120 | 2  | 2  | 2  |
| gi 50292597 | hypothetical protein [ <i>Candida glabrata</i> CBS 138]            | 20962 | 117 | 4  | 4  | 26 |
| gi 50287951 | 60S acidic ribosomal protein P0 [ <i>Candida glabrata</i> CBS 138] | 33572 | 109 | 3  | 2  | 6  |
| gi 18073449 | GAS-1 homologue [ <i>Candida glabrata</i> ]                        | 60675 | 102 | 2  | 2  | 4  |
| gi 50294205 | 60S ribosomal protein L25 [ <i>Candida glabrata</i> CBS 138]       | 15695 | 101 | 2  | 2  | 18 |

|                                       |                                                             |        |     |    |    |    |
|---------------------------------------|-------------------------------------------------------------|--------|-----|----|----|----|
| gi 50284869                           | hypothetical protein [ <i>Candida glabrata</i> CBS 138]     | 30312  | 99  | 3  | 3  | 8  |
| gi 50289515                           | 60S ribosomal protein L1 [ <i>Candida glabrata</i> CBS 138] | 24636  | 91  | 2  | 2  | 9  |
| gi 50284867                           | hypothetical protein [ <i>Candida glabrata</i> CBS 138]     | 61973  | 91  | 2  | 2  | 4  |
| gi 50287007                           | hypothetical protein [ <i>Candida glabrata</i> CBS 138]     | 66848  | 83  | 2  | 2  | 3  |
| gi 50291211                           | hypothetical protein [ <i>Candida glabrata</i> CBS 138]     | 57104  | 79  | 1  | 1  | 2  |
| gi 50285099                           | hypothetical protein [ <i>Candida glabrata</i> CBS 138]     | 54057  | 72  | 1  | 1  | 2  |
| gi 50292725                           | hypothetical protein [ <i>Candida glabrata</i> CBS 138]     | 80983  | 66  | 3  | 2  | 4  |
| gi 50294171                           | hypothetical protein [ <i>Candida glabrata</i> CBS 138]     | 30205  | 61  | 1  | 1  | 5  |
| gi 50294025                           | hypothetical protein [ <i>Candida glabrata</i> CBS 138]     | 43265  | 58  | 2  | 2  | 4  |
| <b>surface shaving with trypsin 4</b> |                                                             |        |     |    |    |    |
| gi 50292035                           | hypothetical protein [ <i>Candida glabrata</i> CBS 138]     | 136648 | 697 | 22 | 18 | 14 |
| gi 50288681                           | hypothetical protein [ <i>Candida glabrata</i> CBS 138]     | 35985  | 588 | 16 | 12 | 44 |
| gi 50286669                           | hypothetical protein [ <i>Candida glabrata</i> CBS 138]     | 59098  | 513 | 14 | 8  | 19 |
| gi 50289857                           | hypothetical protein [ <i>Candida glabrata</i> CBS 138]     | 46767  | 502 | 10 | 9  | 26 |
| gi 50289685                           | hypothetical protein [ <i>Candida glabrata</i> CBS 138]     | 51468  | 487 | 14 | 12 | 26 |
| gi 50294560                           | hypothetical protein [ <i>Candida glabrata</i> CBS 138]     | 62152  | 449 | 12 | 12 | 24 |
| gi 50294908                           | hypothetical protein [ <i>Candida glabrata</i> CBS 138]     | 54975  | 430 | 8  | 8  | 19 |
| gi 50295024                           | hypothetical protein [ <i>Candida glabrata</i> CBS 138]     | 53878  | 393 | 7  | 6  | 16 |
| gi 50292739                           | acetate--CoA ligase [ <i>Candida glabrata</i> CBS 138]      | 79670  | 330 | 11 | 11 | 16 |
| gi 50287897                           | hypothetical protein [ <i>Candida glabrata</i> CBS 138]     | 39767  | 310 | 5  | 4  | 14 |
| gi 50291073                           | hypothetical protein [ <i>Candida glabrata</i> CBS 138]     | 37779  | 227 | 5  | 4  | 13 |

|                              |                                                                    |        |     |    |    |    |
|------------------------------|--------------------------------------------------------------------|--------|-----|----|----|----|
| gi 50293403                  | hypothetical protein [ <i>Candida glabrata</i> CBS 138]            | 44704  | 224 | 5  | 5  | 14 |
| gi 8927040                   | elongation factor 2 [ <i>Candida glabrata</i> ]                    | 90394  | 221 | 6  | 6  | 10 |
| gi 50290317                  | hypothetical protein [ <i>Candida glabrata</i> CBS 138]            | 37920  | 153 | 3  | 3  | 8  |
| gi 50284869                  | hypothetical protein [ <i>Candida glabrata</i> CBS 138]            | 30312  | 135 | 3  | 3  | 8  |
| gi 50290013                  | hypothetical protein [ <i>Candida glabrata</i> CBS 138]            | 44930  | 116 | 3  | 3  | 8  |
| gi 50292893                  | hypothetical protein [ <i>Candida glabrata</i> CBS 138]            | 39503  | 114 | 4  | 3  | 10 |
| gi 50286153                  | hypothetical protein [ <i>Candida glabrata</i> CBS 138]            | 30297  | 81  | 2  | 2  | 5  |
| gi 50294171                  | hypothetical protein [ <i>Candida glabrata</i> CBS 138]            | 30205  | 78  | 2  | 1  | 5  |
| gi 50292597                  | hypothetical protein [ <i>Candida glabrata</i> CBS 138]            | 20962  | 76  | 3  | 3  | 12 |
| gi 50285099                  | hypothetical protein [ <i>Candida glabrata</i> CBS 138]            | 54057  | 75  | 1  | 1  | 2  |
| gi 50287951                  | 60S acidic ribosomal protein P0 [ <i>Candida glabrata</i> CBS 138] | 33572  | 73  | 2  | 2  | 6  |
| gi 50289459                  | hypothetical protein [ <i>Candida glabrata</i> CBS 138]            | 26968  | 62  | 1  | 1  | 6  |
| gi 50293465                  | hypothetical protein [ <i>Candida glabrata</i> CBS 138]            | 19705  | 61  | 1  | 1  | 7  |
| <b>vesicles sonication 1</b> |                                                                    |        |     |    |    |    |
| gi 50288681                  | hypothetical protein [ <i>Candida glabrata</i> CBS 138]            | 35985  | 886 | 29 | 16 | 60 |
| gi 50292035                  | hypothetical protein [ <i>Candida glabrata</i> CBS 138]            | 136648 | 851 | 22 | 19 | 18 |
| gi 452816300                 | acid trehalase [ <i>Candida glabrata</i> ]                         | 136605 | 683 | 20 | 15 | 16 |
| gi 50294908                  | hypothetical protein [ <i>Candida glabrata</i> CBS 138]            | 54975  | 634 | 15 | 15 | 35 |
| gi 50293403                  | hypothetical protein [ <i>Candida glabrata</i> CBS 138]            | 44704  | 632 | 19 | 18 | 50 |
| gi 50289857                  | hypothetical protein [ <i>Candida glabrata</i> CBS 138]            | 46767  | 612 | 12 | 10 | 27 |
| gi 50286669                  | hypothetical protein [ <i>Candida glabrata</i> CBS 138]            | 59098  | 592 | 20 | 9  | 18 |

|              |                                                                    |       |     |    |    |    |
|--------------|--------------------------------------------------------------------|-------|-----|----|----|----|
| gi 50289685  | hypothetical protein [ <i>Candida glabrata</i> CBS 138]            | 51468 | 548 | 16 | 13 | 27 |
| gi 25992752  | pyruvate decarboxylase [ <i>Candida glabrata</i> ]                 | 62011 | 532 | 17 | 13 | 26 |
| gi 50294560  | hypothetical protein [ <i>Candida glabrata</i> CBS 138]            | 62152 | 532 | 17 | 13 | 26 |
| gi 50284733  | hypothetical protein [ <i>Candida glabrata</i> CBS 138]            | 98941 | 502 | 8  | 8  | 10 |
| gi 50288687  | hypothetical protein [ <i>Candida glabrata</i> CBS 138]            | 49013 | 429 | 11 | 10 | 23 |
| gi 50287897  | hypothetical protein [ <i>Candida glabrata</i> CBS 138]            | 39767 | 388 | 8  | 7  | 27 |
| gi 50290013  | hypothetical protein [ <i>Candida glabrata</i> CBS 138]            | 44930 | 357 | 9  | 8  | 21 |
| gi 50290317  | hypothetical protein [ <i>Candida glabrata</i> CBS 138]            | 37920 | 355 | 9  | 8  | 26 |
| gi 50287951  | 60S acidic ribosomal protein P0 [ <i>Candida glabrata</i> CBS 138] | 33572 | 320 | 6  | 6  | 24 |
| gi 50284865  | hypothetical protein [ <i>Candida glabrata</i> CBS 138]            | 62304 | 292 | 7  | 7  | 19 |
| gi 50284869  | hypothetical protein [ <i>Candida glabrata</i> CBS 138]            | 30312 | 277 | 6  | 6  | 21 |
| gi 50295070  | hypothetical protein [ <i>Candida glabrata</i> CBS 138]            | 61157 | 269 | 6  | 5  | 12 |
| gi 50295024  | hypothetical protein [ <i>Candida glabrata</i> CBS 138]            | 53878 | 220 | 5  | 5  | 13 |
| gi 8927040   | elongation factor 2 [ <i>Candida glabrata</i> ]                    | 90394 | 196 | 3  | 3  | 4  |
| gi 50284959  | hypothetical protein [ <i>Candida glabrata</i> CBS 138]            | 93783 | 196 | 3  | 3  | 3  |
| gi 50293465  | hypothetical protein [ <i>Candida glabrata</i> CBS 138]            | 19705 | 187 | 5  | 3  | 13 |
| gi 50284809  | 60S ribosomal protein L30 [ <i>Candida glabrata</i> CBS 138]       | 11362 | 186 | 4  | 4  | 40 |
| gi 50294171  | hypothetical protein [ <i>Candida glabrata</i> CBS 138]            | 30205 | 179 | 5  | 3  | 19 |
| gi 18073449  | GAS-1 homologue [ <i>Candida glabrata</i> ]                        | 60675 | 176 | 5  | 4  | 9  |
| gi 50287895  | hypothetical protein [ <i>Candida glabrata</i> CBS 138]            | 60701 | 176 | 5  | 4  | 9  |
| gi 302309608 | hypothetical protein [ <i>Candida glabrata</i> CBS 138]            | 66558 | 168 | 5  | 5  | 12 |





|              |                                                         |        |     |    |    |    |
|--------------|---------------------------------------------------------|--------|-----|----|----|----|
| gi 50288681  | hypothetical protein [ <i>Candida glabrata</i> CBS 138] | 35985  | 621 | 22 | 13 | 46 |
| gi 50289857  | hypothetical protein [ <i>Candida glabrata</i> CBS 138] | 46767  | 598 | 12 | 9  | 25 |
| gi 50286669  | hypothetical protein [ <i>Candida glabrata</i> CBS 138] | 59098  | 548 | 17 | 10 | 19 |
| gi 50292035  | hypothetical protein [ <i>Candida glabrata</i> CBS 138] | 136648 | 536 | 18 | 13 | 13 |
| gi 50287897  | hypothetical protein [ <i>Candida glabrata</i> CBS 138] | 39767  | 508 | 13 | 9  | 32 |
| gi 25992752  | pyruvate decarboxylase [ <i>Candida glabrata</i> ]      | 62011  | 443 | 13 | 12 | 26 |
| gi 50294560  | hypothetical protein [ <i>Candida glabrata</i> CBS 138] | 62152  | 443 | 13 | 12 | 26 |
| gi 50290013  | hypothetical protein [ <i>Candida glabrata</i> CBS 138] | 44930  | 416 | 12 | 10 | 29 |
| gi 50289685  | hypothetical protein [ <i>Candida glabrata</i> CBS 138] | 51468  | 387 | 9  | 8  | 18 |
| gi 50285407  | hypothetical protein [ <i>Candida glabrata</i> CBS 138] | 29899  | 296 | 8  | 8  | 40 |
| gi 50291073  | hypothetical protein [ <i>Candida glabrata</i> CBS 138] | 37779  | 272 | 6  | 5  | 15 |
| gi 50295024  | hypothetical protein [ <i>Candida glabrata</i> CBS 138] | 53878  | 267 | 5  | 5  | 13 |
| gi 18073449  | GAS-1 homologue [ <i>Candida glabrata</i> ]             | 60675  | 234 | 6  | 5  | 11 |
| gi 50295070  | hypothetical protein [ <i>Candida glabrata</i> CBS 138] | 61157  | 228 | 7  | 4  | 9  |
| gi 50294908  | hypothetical protein [ <i>Candida glabrata</i> CBS 138] | 54975  | 223 | 7  | 7  | 17 |
| gi 50293403  | hypothetical protein [ <i>Candida glabrata</i> CBS 138] | 44704  | 207 | 6  | 6  | 19 |
| gi 50290317  | hypothetical protein [ <i>Candida glabrata</i> CBS 138] | 37920  | 192 | 3  | 3  | 9  |
| gi 20258069  | phospholipase B [ <i>Candida glabrata</i> ]             | 72217  | 187 | 4  | 4  | 6  |
| gi 50292597  | hypothetical protein [ <i>Candida glabrata</i> CBS 138] | 20962  | 139 | 4  | 4  | 15 |
| gi 452816300 | acid trehalase [ <i>Candida glabrata</i> ]              | 136605 | 134 | 5  | 5  | 4  |
| gi 50294025  | hypothetical protein [ <i>Candida glabrata</i> CBS 138] | 43265  | 131 | 2  | 2  | 5  |

|                              |                                                                    |        |     |    |    |    |
|------------------------------|--------------------------------------------------------------------|--------|-----|----|----|----|
| gi 50287737                  | hypothetical protein [ <i>Candida glabrata</i> CBS 138]            | 21335  | 126 | 3  | 3  | 20 |
| gi 50289459                  | hypothetical protein [ <i>Candida glabrata</i> CBS 138]            | 26968  | 124 | 4  | 4  | 18 |
| gi 50284733                  | hypothetical protein [ <i>Candida glabrata</i> CBS 138]            | 98941  | 111 | 3  | 3  | 3  |
| gi 50287951                  | 60S acidic ribosomal protein P0 [ <i>Candida glabrata</i> CBS 138] | 33572  | 104 | 3  | 3  | 11 |
| gi 50294171                  | hypothetical protein [ <i>Candida glabrata</i> CBS 138]            | 30205  | 87  | 3  | 2  | 11 |
| gi 50287735                  | hypothetical protein [ <i>Candida glabrata</i> CBS 138]            | 20710  | 82  | 3  | 3  | 21 |
| gi 50288349                  | hypothetical protein [ <i>Candida glabrata</i> CBS 138]            | 32424  | 71  | 3  | 3  | 8  |
| <b>vesicles sonication 3</b> |                                                                    |        |     |    |    |    |
| gi 50286669                  | hypothetical protein [ <i>Candida glabrata</i> CBS 138]            | 59098  | 369 | 9  | 7  | 17 |
| gi 50288681                  | hypothetical protein [ <i>Candida glabrata</i> CBS 138]            | 35985  | 310 | 10 | 9  | 35 |
| gi 50294908                  | hypothetical protein [ <i>Candida glabrata</i> CBS 138]            | 54975  | 295 | 10 | 10 | 24 |
| gi 50292035                  | hypothetical protein [ <i>Candida glabrata</i> CBS 138]            | 136648 | 291 | 8  | 8  | 7  |
| gi 452816300                 | acid trehalase [ <i>Candida glabrata</i> ]                         | 136605 | 291 | 8  | 8  | 7  |
| gi 50288687                  | hypothetical protein [ <i>Candida glabrata</i> CBS 138]            | 49013  | 259 | 8  | 8  | 21 |
| gi 50291073                  | hypothetical protein [ <i>Candida glabrata</i> CBS 138]            | 37779  | 258 | 7  | 6  | 23 |
| gi 50293403                  | hypothetical protein [ <i>Candida glabrata</i> CBS 138]            | 44704  | 238 | 7  | 7  | 19 |
| gi 50290317                  | hypothetical protein [ <i>Candida glabrata</i> CBS 138]            | 37920  | 216 | 5  | 4  | 13 |
| gi 50289685                  | hypothetical protein [ <i>Candida glabrata</i> CBS 138]            | 51468  | 208 | 6  | 6  | 13 |
| gi 25992752                  | pyruvate decarboxylase [ <i>Candida glabrata</i> ]                 | 62011  | 152 | 4  | 4  | 8  |
| gi 50294560                  | hypothetical protein [ <i>Candida glabrata</i> CBS 138]            | 62152  | 152 | 4  | 4  | 8  |
| gi 50289857                  | hypothetical protein [ <i>Candida glabrata</i> CBS 138]            | 46767  | 137 | 3  | 3  | 8  |

|                                                   |                                                         |        |     |    |    |    |
|---------------------------------------------------|---------------------------------------------------------|--------|-----|----|----|----|
| gi 50294025                                       | hypothetical protein [ <i>Candida glabrata</i> CBS 138] | 43265  | 103 | 2  | 2  | 5  |
| gi 50295070                                       | hypothetical protein [ <i>Candida glabrata</i> CBS 138] | 61157  | 88  | 3  | 3  | 6  |
| gi 50287897                                       | hypothetical protein [ <i>Candida glabrata</i> CBS 138] | 39767  | 84  | 2  | 2  | 6  |
| gi 20258069                                       | phospholipase B [ <i>Candida glabrata</i> ]             | 72217  | 65  | 2  | 2  | 3  |
| gi 50291585                                       | hypothetical protein [ <i>Candida glabrata</i> CBS 138] | 72055  | 65  | 2  | 2  | 3  |
| gi 50286919                                       | hypothetical protein [ <i>Candida glabrata</i> CBS 138] | 44251  | 57  | 2  | 2  | 4  |
| gi 50292739                                       | acetate-CoA ligase [ <i>Candida glabrata</i> CBS 138]   | 79670  | 55  | 1  | 1  | 1  |
| <b>fraction enriched with membrane proteins 1</b> |                                                         |        |     |    |    |    |
| gi 50288681                                       | hypothetical protein [ <i>Candida glabrata</i> CBS 138] | 35985  | 599 | 14 | 9  | 31 |
| gi 50292035                                       | hypothetical protein [ <i>Candida glabrata</i> CBS 138] | 136648 | 516 | 18 | 11 | 11 |
| gi 50286669                                       | hypothetical protein [ <i>Candida glabrata</i> CBS 138] | 59098  | 497 | 14 | 9  | 21 |
| gi 50289685                                       | hypothetical protein [ <i>Candida glabrata</i> CBS 138] | 51468  | 437 | 13 | 11 | 21 |
| gi 50289857                                       | hypothetical protein [ <i>Candida glabrata</i> CBS 138] | 46767  | 420 | 9  | 8  | 24 |
| gi 50294908                                       | hypothetical protein [ <i>Candida glabrata</i> CBS 138] | 54975  | 398 | 9  | 9  | 20 |
| gi 50284959                                       | hypothetical protein [ <i>Candida glabrata</i> CBS 138] | 93783  | 356 | 8  | 8  | 11 |
| gi 50290317                                       | hypothetical protein [ <i>Candida glabrata</i> CBS 138] | 37920  | 330 | 7  | 7  | 24 |
| gi 50284865                                       | hypothetical protein [ <i>Candida glabrata</i> CBS 138] | 62304  | 313 | 6  | 5  | 10 |
| gi 50284733                                       | hypothetical protein [ <i>Candida glabrata</i> CBS 138] | 98941  | 302 | 6  | 6  | 7  |
| gi 50294560                                       | hypothetical protein [ <i>Candida glabrata</i> CBS 138] | 62152  | 297 | 9  | 9  | 21 |
| gi 50293403                                       | hypothetical protein [ <i>Candida glabrata</i> CBS 138] | 44704  | 295 | 7  | 7  | 27 |
| gi 50284867                                       | hypothetical protein [ <i>Candida glabrata</i> CBS 138] | 61973  | 287 | 5  | 5  | 9  |

|                                                   |                                                         |       |     |    |   |    |
|---------------------------------------------------|---------------------------------------------------------|-------|-----|----|---|----|
| gi 50287897                                       | hypothetical protein [ <i>Candida glabrata</i> CBS 138] | 39767 | 255 | 6  | 4 | 17 |
| gi 50295024                                       | hypothetical protein [ <i>Candida glabrata</i> CBS 138] | 53878 | 205 | 4  | 4 | 12 |
| gi 50289283                                       | hypothetical protein [ <i>Candida glabrata</i> CBS 138] | 42203 | 194 | 4  | 4 | 13 |
| gi 50291073                                       | hypothetical protein [ <i>Candida glabrata</i> CBS 138] | 37779 | 183 | 5  | 3 | 10 |
| gi 50292739                                       | acetate--CoA ligase [ <i>Candida glabrata</i> CBS 138]  | 79670 | 164 | 3  | 3 | 5  |
| gi 50294171                                       | hypothetical protein [ <i>Candida glabrata</i> CBS 138] | 30205 | 152 | 4  | 3 | 17 |
| gi 50288687                                       | hypothetical protein [ <i>Candida glabrata</i> CBS 138] | 49013 | 137 | 5  | 5 | 15 |
| gi 50284751                                       | hypothetical protein [ <i>Candida glabrata</i> CBS 138] | 62484 | 133 | 2  | 2 | 3  |
| gi 50293465                                       | hypothetical protein [ <i>Candida glabrata</i> CBS 138] | 19705 | 90  | 1  | 1 | 7  |
| gi 50286375                                       | hypothetical protein [ <i>Candida glabrata</i> CBS 138] | 42980 | 89  | 4  | 3 | 11 |
| gi 302309608                                      | hypothetical protein [ <i>Candida glabrata</i> CBS 138] | 66558 | 85  | 3  | 3 | 5  |
| gi 50287007                                       | hypothetical protein [ <i>Candida glabrata</i> CBS 138] | 66848 | 78  | 2  | 2 | 3  |
| gi 50292893                                       | hypothetical protein [ <i>Candida glabrata</i> CBS 138] | 39503 | 73  | 2  | 2 | 4  |
| gi 50287735                                       | hypothetical protein [ <i>Candida glabrata</i> CBS 138] | 20710 | 65  | 2  | 2 | 16 |
| gi 50286871                                       | hypothetical protein [ <i>Candida glabrata</i> CBS 138] | 73467 | 65  | 1  | 1 | 2  |
| gi 50285407                                       | hypothetical protein [ <i>Candida glabrata</i> CBS 138] | 29899 | 61  | 2  | 2 | 9  |
| gi 9650673                                        | actin [ <i>Candida glabrata</i> ]                       | 36600 | 57  | 2  | 2 | 7  |
| <b>fraction enriched with membrane proteins 2</b> |                                                         |       |     |    |   |    |
| gi 50284733                                       | hypothetical protein [ <i>Candida glabrata</i> CBS 138] | 98941 | 400 | 7  | 7 | 8  |
| gi 50284865                                       | hypothetical protein [ <i>Candida glabrata</i> CBS 138] | 62304 | 374 | 10 | 7 | 18 |
| gi 50288681                                       | hypothetical protein [ <i>Candida glabrata</i> CBS 138] | 35985 | 351 | 8  | 6 | 26 |

|                                                   |                                                         |        |     |   |   |    |
|---------------------------------------------------|---------------------------------------------------------|--------|-----|---|---|----|
| gi 25992752                                       | pyruvate decarboxylase [ <i>Candida glabrata</i> ]      | 62011  | 206 | 5 | 5 | 11 |
| gi 50289857                                       | hypothetical protein [ <i>Candida glabrata</i> CBS 138] | 46767  | 205 | 4 | 3 | 9  |
| gi 50294908                                       | hypothetical protein [ <i>Candida glabrata</i> CBS 138] | 54975  | 189 | 4 | 4 | 10 |
| gi 50284867                                       | hypothetical protein [ <i>Candida glabrata</i> CBS 138] | 61973  | 184 | 5 | 4 | 8  |
| gi 302309608                                      | hypothetical protein [ <i>Candida glabrata</i> CBS 138] | 66558  | 153 | 5 | 5 | 10 |
| gi 50286669                                       | hypothetical protein [ <i>Candida glabrata</i> CBS 138] | 59098  | 149 | 5 | 3 | 6  |
| gi 50292035                                       | hypothetical protein [ <i>Candida glabrata</i> CBS 138] | 136648 | 140 | 4 | 4 | 4  |
| gi 50286871                                       | hypothetical protein [ <i>Candida glabrata</i> CBS 138] | 73467  | 138 | 3 | 3 | 5  |
| gi 50293403                                       | hypothetical protein [ <i>Candida glabrata</i> CBS 138] | 44704  | 110 | 2 | 2 | 5  |
| gi 50292213                                       | hypothetical protein [ <i>Candida glabrata</i> CBS 138] | 77437  | 95  | 3 | 3 | 4  |
| gi 50289685                                       | hypothetical protein [ <i>Candida glabrata</i> CBS 138] | 51468  | 81  | 2 | 2 | 5  |
| gi 50287107                                       | hypothetical protein [ <i>Candida glabrata</i> CBS 138] | 61626  | 76  | 2 | 2 | 3  |
| gi 50284869                                       | hypothetical protein [ <i>Candida glabrata</i> CBS 138] | 30312  | 75  | 2 | 2 | 5  |
| gi 50284959                                       | hypothetical protein [ <i>Candida glabrata</i> CBS 138] | 93783  | 75  | 3 | 3 | 3  |
| gi 50286375                                       | hypothetical protein [ <i>Candida glabrata</i> CBS 138] | 42980  | 72  | 4 | 3 | 11 |
| gi 50295024                                       | hypothetical protein [ <i>Candida glabrata</i> CBS 138] | 53878  | 65  | 1 | 1 | 2  |
| gi 50288349                                       | hypothetical protein [ <i>Candida glabrata</i> CBS 138] | 32424  | 63  | 1 | 1 | 3  |
| gi 50292597                                       | hypothetical protein [ <i>Candida glabrata</i> CBS 138] | 20962  | 58  | 2 | 2 | 7  |
| gi 50288355                                       | hypothetical protein [ <i>Candida glabrata</i> CBS 138] | 28757  | 55  | 2 | 1 | 7  |
| <b>fraction enriched with membrane proteins 3</b> |                                                         |        |     |   |   |    |
| gi 50288681                                       | hypothetical protein [ <i>Candida glabrata</i> CBS 138] | 35985  | 365 | 7 | 6 | 19 |

|              |                                                         |        |     |   |   |    |
|--------------|---------------------------------------------------------|--------|-----|---|---|----|
| gi 50284733  | hypothetical protein [ <i>Candida glabrata</i> CBS 138] | 98941  | 302 | 6 | 6 | 8  |
| gi 50286669  | hypothetical protein [ <i>Candida glabrata</i> CBS 138] | 59098  | 248 | 7 | 5 | 11 |
| gi 50284865  | hypothetical protein [ <i>Candida glabrata</i> CBS 138] | 62304  | 228 | 6 | 5 | 13 |
| gi 50284867  | hypothetical protein [ <i>Candida glabrata</i> CBS 138] | 61973  | 214 | 5 | 5 | 12 |
| gi 302309608 | hypothetical protein [ <i>Candida glabrata</i> CBS 138] | 66558  | 207 | 5 | 5 | 10 |
| gi 50289857  | hypothetical protein [ <i>Candida glabrata</i> CBS 138] | 46767  | 184 | 3 | 3 | 11 |
| gi 50294908  | hypothetical protein [ <i>Candida glabrata</i> CBS 138] | 54975  | 166 | 3 | 3 | 8  |
| gi 50294560  | hypothetical protein [ <i>Candida glabrata</i> CBS 138] | 62152  | 161 | 5 | 5 | 9  |
| gi 50295024  | hypothetical protein [ <i>Candida glabrata</i> CBS 138] | 53878  | 156 | 2 | 2 | 5  |
| gi 50286871  | hypothetical protein [ <i>Candida glabrata</i> CBS 138] | 73467  | 151 | 3 | 3 | 5  |
| gi 50287737  | hypothetical protein [ <i>Candida glabrata</i> CBS 138] | 21335  | 148 | 3 | 3 | 23 |
| gi 50293403  | hypothetical protein [ <i>Candida glabrata</i> CBS 138] | 44704  | 134 | 2 | 2 | 5  |
| gi 50284959  | hypothetical protein [ <i>Candida glabrata</i> CBS 138] | 93783  | 133 | 4 | 4 | 4  |
| gi 50290317  | hypothetical protein [ <i>Candida glabrata</i> CBS 138] | 37920  | 109 | 2 | 2 | 6  |
| gi 50287007  | hypothetical protein [ <i>Candida glabrata</i> CBS 138] | 66848  | 97  | 2 | 1 | 2  |
| gi 50292035  | hypothetical protein [ <i>Candida glabrata</i> CBS 138] | 136648 | 96  | 4 | 3 | 2  |
| gi 50284875  | hypothetical protein [ <i>Candida glabrata</i> CBS 138] | 62161  | 89  | 1 | 1 | 2  |
| gi 50284869  | hypothetical protein [ <i>Candida glabrata</i> CBS 138] | 30312  | 80  | 2 | 2 | 5  |
| gi 50290935  | hypothetical protein [ <i>Candida glabrata</i> CBS 138] | 29748  | 78  | 2 | 1 | 6  |
| gi 50287107  | hypothetical protein [ <i>Candida glabrata</i> CBS 138] | 61626  | 71  | 2 | 2 | 3  |
| gi 50286005  | hypothetical protein [ <i>Candida glabrata</i> CBS 138] | 80047  | 69  | 3 | 2 | 4  |

|                                                   |                                                                    |        |     |    |    |    |
|---------------------------------------------------|--------------------------------------------------------------------|--------|-----|----|----|----|
| gi 50290059                                       | hypothetical protein [ <i>Candida glabrata</i> CBS 138]            | 171561 | 61  | 2  | 2  | 1  |
| gi 50293465                                       | hypothetical protein [ <i>Candida glabrata</i> CBS 138]            | 19705  | 60  | 1  | 1  | 7  |
| gi 50290013                                       | hypothetical protein [ <i>Candida glabrata</i> CBS 138]            | 44930  | 56  | 2  | 2  | 4  |
| gi 50292893                                       | hypothetical protein [ <i>Candida glabrata</i> CBS 138]            | 39503  | 56  | 2  | 2  | 4  |
| <b>fraction enriched with membrane proteins 4</b> |                                                                    |        |     |    |    |    |
| gi 50288681                                       | hypothetical protein [ <i>Candida glabrata</i> CBS 138]            | 35985  | 508 | 14 | 11 | 45 |
| gi 50293403                                       | hypothetical protein [ <i>Candida glabrata</i> CBS 138]            | 44704  | 483 | 15 | 14 | 43 |
| gi 50289857                                       | hypothetical protein [ <i>Candida glabrata</i> CBS 138]            | 46767  | 430 | 9  | 8  | 23 |
| gi 50286669                                       | hypothetical protein [ <i>Candida glabrata</i> CBS 138]            | 59098  | 363 | 11 | 7  | 12 |
| gi 50292035                                       | hypothetical protein [ <i>Candida glabrata</i> CBS 138]            | 136648 | 357 | 11 | 11 | 9  |
| gi 50288687                                       | hypothetical protein [ <i>Candida glabrata</i> CBS 138]            | 49013  | 295 | 8  | 8  | 20 |
| gi 50289685                                       | hypothetical protein [ <i>Candida glabrata</i> CBS 138]            | 51468  | 282 | 9  | 9  | 18 |
| gi 50289283                                       | hypothetical protein [ <i>Candida glabrata</i> CBS 138]            | 42203  | 214 | 4  | 4  | 12 |
| gi 50284869                                       | hypothetical protein [ <i>Candida glabrata</i> CBS 138]            | 30312  | 191 | 4  | 4  | 16 |
| gi 50290013                                       | hypothetical protein [ <i>Candida glabrata</i> CBS 138]            | 44930  | 189 | 5  | 5  | 14 |
| gi 50287897                                       | hypothetical protein [ <i>Candida glabrata</i> CBS 138]            | 39767  | 179 | 4  | 4  | 15 |
| gi 50295024                                       | hypothetical protein [ <i>Candida glabrata</i> CBS 138]            | 53878  | 166 | 4  | 4  | 10 |
| gi 50294908                                       | hypothetical protein [ <i>Candida glabrata</i> CBS 138]            | 54975  | 164 | 5  | 5  | 11 |
| gi 50287951                                       | 60S acidic ribosomal protein P0 [ <i>Candida glabrata</i> CBS 138] | 33572  | 156 | 5  | 4  | 15 |
| gi 50290317                                       | hypothetical protein [ <i>Candida glabrata</i> CBS 138]            | 37920  | 154 | 3  | 3  | 10 |
| gi 50284809                                       | 60S ribosomal protein L30 [ <i>Candida glabrata</i> CBS 138]       | 11362  | 130 | 4  | 4  | 44 |



|             |                                                         |       |     |   |   |    |
|-------------|---------------------------------------------------------|-------|-----|---|---|----|
| gi 50289459 | hypothetical protein [ <i>Candida glabrata</i> CBS 138] | 26968 | 130 | 4 | 4 | 17 |
| gi 50286153 | hypothetical protein [ <i>Candida glabrata</i> CBS 138] | 30297 | 121 | 3 | 3 | 13 |
| gi 25992752 | pyruvate decarboxylase [ <i>Candida glabrata</i> ]      | 62011 | 116 | 3 | 3 | 6  |
| gi 50294560 | hypothetical protein [ <i>Candida glabrata</i> CBS 138] | 62152 | 116 | 3 | 3 | 6  |
| gi 50292893 | hypothetical protein [ <i>Candida glabrata</i> CBS 138] | 39503 | 104 | 3 | 3 | 9  |
| gi 50287735 | hypothetical protein [ <i>Candida glabrata</i> CBS 138] | 20710 | 84  | 2 | 2 | 13 |
| gi 50294025 | hypothetical protein [ <i>Candida glabrata</i> CBS 138] | 43265 | 80  | 2 | 2 | 5  |
| gi 50285407 | hypothetical protein [ <i>Candida glabrata</i> CBS 138] | 29899 | 69  | 3 | 3 | 11 |
| gi 50287073 | hypothetical protein [ <i>Candida glabrata</i> CBS 138] | 27574 | 68  | 2 | 2 | 8  |
| gi 50286375 | hypothetical protein [ <i>Candida glabrata</i> CBS 138] | 42980 | 66  | 1 | 1 | 2  |
| gi 50292739 | acetate--CoA ligase [ <i>Candida glabrata</i> CBS 138]  | 79670 | 61  | 1 | 1 | 1  |
| gi 50284959 | hypothetical protein [ <i>Candida glabrata</i> CBS 138] | 93783 | 57  | 2 | 2 | 2  |
