# Supplementary material for: Characteristics of Extracellular Vesicles Released by the Pathogenic Yeast-Like Fungi Candida glabrata, Candida parapsilosis and Candida tropicalis
Source: MDPI journal article supplement (doi:10.3390/cells9071722), 2020-07-18
Supplement: s1 [file s1]

**Supplementary Table 3.** Mass spectrometry identification of *C. tropicalis* proteins in EVs after vesicle surface shaving with trypsin, vesicle sonication, or the preparation of fractions enriched with membrane proteins.

The resulting peptides were analyzed using the Dionex Ultimate 3000 UHPLC system coupled to an HCTUltra ETDII mass spectrometer and the obtained lists of peaks were searched against the NCBI protein database using an in-house Mascot server.

| Accession number                      | Protein                                                                           | Molecular mass [Da] | Score | Matches | Sequences | Sequence coverage [%] |
|---------------------------------------|-----------------------------------------------------------------------------------|---------------------|-------|---------|-----------|-----------------------|
| <b>surface shaving with trypsin 1</b> |                                                                                   |                     |       |         |           |                       |
| gi 255728723                          | opaque-phase-specific protein OP4 precursor [ <i>Candida tropicalis</i> MYA-3404] | 43376               | 655   | 16      | 8         | 26                    |
| gi 255733002                          | plasma membrane ATPase 1 [ <i>Candida tropicalis</i> MYA-3404]                    | 98358               | 570   | 10      | 10        | 11                    |
| gi 255729274                          | conserved hypothetical protein [ <i>Candida tropicalis</i> MYA-3404]              | 37686               | 386   | 10      | 5         | 19                    |
| gi 255729942                          | hypothetical protein CTRG_04193 [ <i>Candida tropicalis</i> MYA-3404]             | 120876              | 384   | 9       | 8         | 8                     |
| gi 255731223                          | conserved hypothetical protein [ <i>Candida tropicalis</i> MYA-3404]              | 38035               | 376   | 8       | 6         | 22                    |
| gi 255722347                          | hypothetical protein CTRG_00890 [ <i>Candida tropicalis</i> MYA-3404]             | 53021               | 323   | 6       | 6         | 15                    |
| gi 255729820                          | conserved hypothetical protein [ <i>Candida tropicalis</i> MYA-3404]              | 35427               | 216   | 5       | 4         | 13                    |
| gi 255729832                          | conserved hypothetical protein [ <i>Candida tropicalis</i> MYA-3404]              | 21663               | 216   | 5       | 4         | 22                    |
| gi 255730149                          | protein EPD1 precursor [ <i>Candida tropicalis</i> MYA-3404]                      | 59740               | 211   | 4       | 4         | 9                     |
| gi 255727428                          | phosphoglycerate kinase [ <i>Candida tropicalis</i> MYA-3404]                     | 44686               | 166   | 5       | 5         | 14                    |
| gi 255725506                          | conserved hypothetical protein [ <i>Candida tropicalis</i> MYA-3404]              | 31403               | 138   | 3       | 2         | 12                    |
| gi 255720907                          | glucan 1,3-beta-glucosidase precursor [ <i>Candida tropicalis</i> MYA-3404]       | 34181               | 129   | 3       | 3         | 12                    |

|                                       |                                                                                   |        |     |    |   |    |
|---------------------------------------|-----------------------------------------------------------------------------------|--------|-----|----|---|----|
| gi 255732890                          | glyceraldehyde-3-phosphate dehydrogenase [ <i>Candida tropicalis</i> MYA-3404]    | 36209  | 127 | 3  | 3 | 11 |
| gi 255722852                          | predicted protein [ <i>Candida tropicalis</i> MYA-3404]                           | 194842 | 119 | 3  | 3 | 1  |
| gi 255732910                          | predicted protein [ <i>Candida tropicalis</i> MYA-3404]                           | 77134  | 112 | 3  | 3 | 3  |
| gi 255721523                          | predicted protein [ <i>Candida tropicalis</i> MYA-3404]                           | 98965  | 106 | 2  | 2 | 3  |
| gi 255729440                          | protein EPD2 precursor [ <i>Candida tropicalis</i> MYA-3404]                      | 61273  | 102 | 2  | 2 | 4  |
| gi 255732521                          | alcohol dehydrogenase 2 [ <i>Candida tropicalis</i> MYA-3404]                     | 37181  | 99  | 3  | 3 | 9  |
| gi 255723898                          | conserved hypothetical protein [ <i>Candida tropicalis</i> MYA-3404]              | 65882  | 98  | 1  | 1 | 2  |
| gi 255725714                          | hypothetical protein CTRG_02093 [ <i>Candida tropicalis</i> MYA-3404]             | 39082  | 90  | 3  | 2 | 8  |
| gi 255727360                          | conserved hypothetical protein [ <i>Candida tropicalis</i> MYA-3404]              | 18653  | 82  | 4  | 4 | 35 |
| gi 255722954                          | lysophospholipase 1 precursor [ <i>Candida tropicalis</i> MYA-3404]               | 70009  | 80  | 2  | 2 | 3  |
| gi 220900339                          | secreted aspartyl protease [ <i>Candida tropicalis</i> ]                          | 31024  | 71  | 1  | 1 | 3  |
| gi 255727881                          | enolase 1 [ <i>Candida tropicalis</i> MYA-3404]                                   | 46984  | 70  | 2  | 2 | 7  |
| gi 255731107                          | predicted protein [ <i>Candida tropicalis</i> MYA-3404]                           | 48865  | 68  | 2  | 2 | 5  |
| gi 255728237                          | predicted protein [ <i>Candida tropicalis</i> MYA-3404]                           | 22931  | 58  | 1  | 1 | 5  |
| gi 255725194                          | elongation factor 1-alpha [ <i>Candida tropicalis</i> MYA-3404]                   | 50336  | 49  | 2  | 2 | 3  |
| <b>surface shaving with trypsin 2</b> |                                                                                   |        |     |    |   |    |
| gi 255728723                          | opaque-phase-specific protein OP4 precursor [ <i>Candida tropicalis</i> MYA-3404] | 43376  | 656 | 24 | 9 | 29 |
| gi 255727428                          | phosphoglycerate kinase [ <i>Candida tropicalis</i> MYA-3404]                     | 44686  | 418 | 9  | 8 | 24 |
| gi 255729274                          | conserved hypothetical protein [ <i>Candida tropicalis</i> MYA-3404]              | 37686  | 406 | 9  | 5 | 19 |

|              |                                                                                |        |     |   |   |    |
|--------------|--------------------------------------------------------------------------------|--------|-----|---|---|----|
| gi 255729942 | hypothetical protein CTRG_04193 [ <i>Candida tropicalis</i> MYA-3404]          | 120876 | 397 | 8 | 8 | 9  |
| gi 255722347 | hypothetical protein CTRG_00890 [ <i>Candida tropicalis</i> MYA-3404]          | 53021  | 349 | 6 | 5 | 15 |
| gi 255731223 | conserved hypothetical protein [ <i>Candida tropicalis</i> MYA-3404]           | 38035  | 327 | 7 | 5 | 16 |
| gi 255729820 | conserved hypothetical protein [ <i>Candida tropicalis</i> MYA-3404]           | 35427  | 290 | 6 | 4 | 16 |
| gi 255729832 | conserved hypothetical protein [ <i>Candida tropicalis</i> MYA-3404]           | 21663  | 290 | 6 | 4 | 27 |
| gi 255723898 | conserved hypothetical protein [ <i>Candida tropicalis</i> MYA-3404]           | 65882  | 285 | 4 | 4 | 8  |
| gi 255723403 | alcohol dehydrogenase 1 [ <i>Candida tropicalis</i> MYA-3404]                  | 43927  | 264 | 6 | 6 | 17 |
| gi 255732890 | glyceraldehyde-3-phosphate dehydrogenase [ <i>Candida tropicalis</i> MYA-3404] | 36209  | 251 | 5 | 4 | 14 |
| gi 255733002 | plasma membrane ATPase 1 [ <i>Candida tropicalis</i> MYA-3404]                 | 98358  | 223 | 4 | 4 | 5  |
| gi 255721523 | predicted protein [ <i>Candida tropicalis</i> MYA-3404]                        | 98965  | 202 | 3 | 3 | 4  |
| gi 255725930 | predicted protein [ <i>Candida tropicalis</i> MYA-3404]                        | 71216  | 194 | 7 | 6 | 8  |
| gi 255720907 | glucan 1,3-beta-glucosidase precursor [ <i>Candida tropicalis</i> MYA-3404]    | 34181  | 184 | 5 | 4 | 12 |
| gi 255725506 | conserved hypothetical protein [ <i>Candida tropicalis</i> MYA-3404]           | 31403  | 156 | 4 | 2 | 12 |
| gi 255730873 | predicted protein [ <i>Candida tropicalis</i> MYA-3404]                        | 23247  | 118 | 3 | 2 | 15 |
| gi 255722852 | predicted protein [ <i>Candida tropicalis</i> MYA-3404]                        | 194842 | 110 | 3 | 3 | 1  |
| gi 255732910 | predicted protein [ <i>Candida tropicalis</i> MYA-3404]                        | 77134  | 101 | 3 | 3 | 3  |
| gi 255730149 | protein EPD1 precursor [ <i>Candida tropicalis</i> MYA-3404]                   | 59740  | 87  | 2 | 2 | 5  |
| gi 255729208 | pyruvate decarboxylase [ <i>Candida tropicalis</i> MYA-3404]                   | 62500  | 79  | 2 | 2 | 7  |
| gi 255728149 | glucoamylase 1 precursor [ <i>Candida tropicalis</i> MYA-3404]                 | 102877 | 78  | 2 | 2 | 3  |
| gi 255721095 | hypothetical protein CTRG_00263 [ <i>Candida tropicalis</i> MYA-3404]          | 49693  | 77  | 1 | 1 | 3  |

|                                       |                                                                                   |        |     |    |   |    |
|---------------------------------------|-----------------------------------------------------------------------------------|--------|-----|----|---|----|
| gi 255722954                          | lysophospholipase 1 precursor [ <i>Candida tropicalis</i> MYA-3404]               | 70009  | 74  | 3  | 2 | 2  |
| gi 255724450                          | pyruvate kinase [ <i>Candida tropicalis</i> MYA-3404]                             | 55729  | 65  | 2  | 2 | 6  |
| gi 220900339                          | secreted aspartyl protease [ <i>Candida tropicalis</i> ]                          | 31024  | 64  | 2  | 2 | 7  |
| gi 255724160                          | elongation factor 2 [ <i>Candida tropicalis</i> MYA-3404]                         | 92277  | 59  | 2  | 2 | 2  |
| gi 255722876                          | predicted protein [ <i>Candida tropicalis</i> MYA-3404]                           | 15870  | 58  | 1  | 1 | 5  |
| gi 255728237                          | predicted protein [ <i>Candida tropicalis</i> MYA-3404]                           | 22931  | 54  | 1  | 1 | 5  |
| <b>surface shaving with trypsin 3</b> |                                                                                   |        |     |    |   |    |
| gi 255728723                          | opaque-phase-specific protein OP4 precursor [ <i>Candida tropicalis</i> MYA-3404] | 43376  | 570 | 15 | 8 | 23 |
| gi 255731223                          | conserved hypothetical protein [ <i>Candida tropicalis</i> MYA-3404]              | 38035  | 424 | 8  | 6 | 22 |
| gi 255733002                          | plasma membrane ATPase 1 [ <i>Candida tropicalis</i> MYA-3404]                    | 98358  | 371 | 6  | 6 | 8  |
| gi 255722347                          | hypothetical protein CTRG_00890 [ <i>Candida tropicalis</i> MYA-3404]             | 53021  | 353 | 7  | 6 | 15 |
| gi 255729942                          | hypothetical protein CTRG_04193 [ <i>Candida tropicalis</i> MYA-3404]             | 120876 | 313 | 8  | 8 | 8  |
| gi 255727428                          | phosphoglycerate kinase [ <i>Candida tropicalis</i> MYA-3404]                     | 44686  | 309 | 8  | 8 | 22 |
| gi 255729274                          | conserved hypothetical protein [ <i>Candida tropicalis</i> MYA-3404]              | 37686  | 291 | 6  | 4 | 13 |
| gi 255732890                          | glyceraldehyde-3-phosphate dehydrogenase [ <i>Candida tropicalis</i> MYA-3404]    | 36209  | 234 | 6  | 6 | 21 |
| gi 255723898                          | conserved hypothetical protein [ <i>Candida tropicalis</i> MYA-3404]              | 65882  | 220 | 3  | 3 | 6  |
| gi 255725506                          | conserved hypothetical protein [ <i>Candida tropicalis</i> MYA-3404]              | 31403  | 210 | 3  | 3 | 14 |
| gi 255723403                          | alcohol dehydrogenase 1 [ <i>Candida tropicalis</i> MYA-3404]                     | 43927  | 177 | 5  | 4 | 13 |
| gi 255729820                          | conserved hypothetical protein [ <i>Candida tropicalis</i> MYA-3404]              | 35427  | 160 | 4  | 3 | 10 |

|                                       |                                                                             |        |     |    |   |    |
|---------------------------------------|-----------------------------------------------------------------------------|--------|-----|----|---|----|
| gi 255729832                          | conserved hypothetical protein [ <i>Candida tropicalis</i> MYA-3404]        | 21663  | 160 | 4  | 3 | 17 |
| gi 255732521                          | alcohol dehydrogenase 2 [ <i>Candida tropicalis</i> MYA-3404]               | 37181  | 150 | 5  | 4 | 14 |
| gi 255721523                          | predicted protein [ <i>Candida tropicalis</i> MYA-3404]                     | 98965  | 149 | 2  | 2 | 3  |
| gi 255722852                          | predicted protein [ <i>Candida tropicalis</i> MYA-3404]                     | 194842 | 111 | 3  | 3 | 1  |
| gi 255724450                          | pyruvate kinase [ <i>Candida tropicalis</i> MYA-3404]                       | 55729  | 106 | 2  | 2 | 5  |
| gi 255729440                          | protein EPD2 precursor [ <i>Candida tropicalis</i> MYA-3404]                | 61273  | 102 | 2  | 2 | 4  |
| gi 255730149                          | protein EPD1 precursor [ <i>Candida tropicalis</i> MYA-3404]                | 59740  | 99  | 2  | 2 | 5  |
| gi 255732093                          | ADP,ATP carrier protein [ <i>Candida tropicalis</i> MYA-3404]               | 33532  | 86  | 2  | 2 | 7  |
| gi 255722021                          | transaldolase [ <i>Candida tropicalis</i> MYA-3404]                         | 35641  | 78  | 2  | 2 | 5  |
| gi 255722954                          | lysophospholipase 1 precursor [ <i>Candida tropicalis</i> MYA-3404]         | 70009  | 76  | 2  | 2 | 4  |
| gi 255727360                          | conserved hypothetical protein [ <i>Candida tropicalis</i> MYA-3404]        | 18653  | 74  | 3  | 3 | 26 |
| gi 255720907                          | glucan 1,3-beta-glucosidase precursor [ <i>Candida tropicalis</i> MYA-3404] | 34181  | 71  | 1  | 1 | 3  |
| gi 255728149                          | glucoamylase 1 precursor [ <i>Candida tropicalis</i> MYA-3404]              | 102877 | 70  | 2  | 2 | 2  |
| gi 255731268                          | hypothetical protein CTRG_04856 [ <i>Candida tropicalis</i> MYA-3404]       | 34741  | 69  | 2  | 2 | 9  |
| gi 255730873                          | predicted protein [ <i>Candida tropicalis</i> MYA-3404]                     | 23247  | 63  | 1  | 1 | 8  |
| gi 255731592                          | peptidyl-prolyl cis-trans isomerase [ <i>Candida tropicalis</i> MYA-3404]   | 14363  | 56  | 2  | 2 | 12 |
| gi 220900339                          | secreted aspartyl protease [ <i>Candida tropicalis</i> ]                    | 31024  | 53  | 1  | 1 | 3  |
| <b>surface shaving with trypsin 4</b> |                                                                             |        |     |    |   |    |
| gi 255720907                          | glucan 1,3-beta-glucosidase precursor [ <i>Candida tropicalis</i> MYA-3404] | 34181  | 432 | 11 | 8 | 28 |
| gi 255729820                          | conserved hypothetical protein [ <i>Candida tropicalis</i> MYA-3404]        | 35427  | 305 | 7  | 5 | 19 |

|                              |                                                                                   |        |     |    |    |    |
|------------------------------|-----------------------------------------------------------------------------------|--------|-----|----|----|----|
| gi 255729832                 | conserved hypothetical protein [ <i>Candida tropicalis</i> MYA-3404]              | 21663  | 305 | 7  | 5  | 31 |
| gi 255722347                 | hypothetical protein CTRG_00890 [ <i>Candida tropicalis</i> MYA-3404]             | 53021  | 294 | 6  | 6  | 15 |
| gi 255725714                 | hypothetical protein CTRG_02093 [ <i>Candida tropicalis</i> MYA-3404]             | 39082  | 182 | 5  | 4  | 17 |
| gi 220900339                 | secreted aspartyl protease [ <i>Candida tropicalis</i> ]                          | 31024  | 164 | 5  | 4  | 10 |
| gi 255730873                 | predicted protein [ <i>Candida tropicalis</i> MYA-3404]                           | 23247  | 149 | 4  | 3  | 26 |
| gi 255728571                 | predicted protein [ <i>Candida tropicalis</i> MYA-3404]                           | 49064  | 121 | 3  | 3  | 6  |
| gi 255727428                 | phosphoglycerate kinase [ <i>Candida tropicalis</i> MYA-3404]                     | 44686  | 96  | 3  | 3  | 8  |
| gi 255722954                 | lysophospholipase 1 precursor [ <i>Candida tropicalis</i> MYA-3404]               | 70009  | 93  | 2  | 2  | 3  |
| gi 255731592                 | peptidyl-prolyl cis-trans isomerase [ <i>Candida tropicalis</i> MYA-3404]         | 14363  | 85  | 3  | 3  | 22 |
| gi 255729942                 | hypothetical protein CTRG_04193 [ <i>Candida tropicalis</i> MYA-3404]             | 120876 | 69  | 2  | 2  | 2  |
| gi 255727881                 | enolase 1 [ <i>Candida tropicalis</i> MYA-3404]                                   | 46984  | 65  | 2  | 2  | 7  |
| gi 255732890                 | glyceraldehyde-3-phosphate dehydrogenase [ <i>Candida tropicalis</i> MYA-3404]    | 36209  | 61  | 2  | 2  | 6  |
| gi 255724074                 | predicted protein [ <i>Candida tropicalis</i> MYA-3404]                           | 163634 | 54  | 1  | 1  | 0  |
| <b>vesicles sonication 1</b> |                                                                                   |        |     |    |    |    |
| gi 255727428                 | phosphoglycerate kinase [ <i>Candida tropicalis</i> MYA-3404]                     | 44686  | 856 | 22 | 19 | 52 |
| gi 255729942                 | hypothetical protein CTRG_04193 [ <i>Candida tropicalis</i> MYA-3404]             | 120876 | 805 | 18 | 17 | 17 |
| gi 255728723                 | opaque-phase-specific protein OP4 precursor [ <i>Candida tropicalis</i> MYA-3404] | 43376  | 567 | 12 | 10 | 26 |
| gi 255728149                 | glucoamylase 1 precursor [ <i>Candida tropicalis</i> MYA-3404]                    | 102877 | 455 | 12 | 11 | 11 |

|              |                                                                             |        |     |    |   |    |
|--------------|-----------------------------------------------------------------------------|--------|-----|----|---|----|
| gi 255725714 | hypothetical protein CTRG_02093 [ <i>Candida tropicalis</i> MYA-3404]       | 39082  | 404 | 10 | 9 | 35 |
| gi 255724450 | pyruvate kinase [ <i>Candida tropicalis</i> MYA-3404]                       | 55729  | 401 | 9  | 9 | 20 |
| gi 255720907 | glucan 1,3-beta-glucosidase precursor [ <i>Candida tropicalis</i> MYA-3404] | 34181  | 379 | 10 | 9 | 27 |
| gi 255729274 | conserved hypothetical protein [ <i>Candida tropicalis</i> MYA-3404]        | 37686  | 308 | 6  | 4 | 15 |
| gi 255725930 | predicted protein [ <i>Candida tropicalis</i> MYA-3404]                     | 71216  | 291 | 7  | 7 | 12 |
| gi 255727881 | enolase 1 [ <i>Candida tropicalis</i> MYA-3404]                             | 46984  | 274 | 6  | 6 | 21 |
| gi 255731223 | conserved hypothetical protein [ <i>Candida tropicalis</i> MYA-3404]        | 38035  | 265 | 4  | 4 | 12 |
| gi 255721523 | predicted protein [ <i>Candida tropicalis</i> MYA-3404]                     | 98965  | 249 | 6  | 6 | 6  |
| gi 255731268 | hypothetical protein CTRG_04856 [ <i>Candida tropicalis</i> MYA-3404]       | 34741  | 236 | 6  | 6 | 21 |
| gi 255733002 | plasma membrane ATPase 1 [ <i>Candida tropicalis</i> MYA-3404]              | 98358  | 227 | 5  | 5 | 6  |
| gi 255729820 | conserved hypothetical protein [ <i>Candida tropicalis</i> MYA-3404]        | 35427  | 210 | 5  | 4 | 13 |
| gi 255729832 | conserved hypothetical protein [ <i>Candida tropicalis</i> MYA-3404]        | 21663  | 210 | 5  | 4 | 22 |
| gi 255723403 | alcohol dehydrogenase 1 [ <i>Candida tropicalis</i> MYA-3404]               | 43927  | 201 | 6  | 6 | 17 |
| gi 255730427 | eukaryotic initiation factor 4A [ <i>Candida tropicalis</i> MYA-3404]       | 44795  | 176 | 4  | 4 | 10 |
| gi 255722852 | predicted protein [ <i>Candida tropicalis</i> MYA-3404]                     | 194842 | 171 | 8  | 4 | 3  |
| gi 261412043 | alcohol dehydrogenase [ <i>Candida tropicalis</i> ]                         | 33332  | 168 | 5  | 5 | 19 |
| gi 255730873 | predicted protein [ <i>Candida tropicalis</i> MYA-3404]                     | 23247  | 161 | 3  | 2 | 15 |
| gi 255720595 | ornithine aminotransferase [ <i>Candida tropicalis</i> MYA-3404]            | 47518  | 155 | 3  | 3 | 7  |
| gi 255732521 | alcohol dehydrogenase 2 [ <i>Candida tropicalis</i> MYA-3404]               | 37181  | 154 | 5  | 5 | 18 |
| gi 255731107 | predicted protein [ <i>Candida tropicalis</i> MYA-3404]                     | 48865  | 151 | 6  | 5 | 13 |
| gi 255732780 | conserved hypothetical protein [ <i>Candida tropicalis</i> MYA-3404]        | 50823  | 127 | 5  | 4 | 12 |

|                              |                                                                                     |        |     |    |    |    |
|------------------------------|-------------------------------------------------------------------------------------|--------|-----|----|----|----|
| gi 255729208                 | pyruvate decarboxylase [ <i>Candida tropicalis</i> MYA-3404]                        | 62500  | 119 | 2  | 2  | 4  |
| gi 255725820                 | glycolipid 2-alpha-mannosyltransferase [ <i>Candida tropicalis</i> MYA-3404]        | 50244  | 119 | 2  | 2  | 4  |
| gi 255725506                 | conserved hypothetical protein [ <i>Candida tropicalis</i> MYA-3404]                | 31403  | 109 | 3  | 3  | 15 |
| gi 255728237                 | predicted protein [ <i>Candida tropicalis</i> MYA-3404]                             | 22931  | 108 | 2  | 2  | 10 |
| gi 255724074                 | predicted protein [ <i>Candida tropicalis</i> MYA-3404]                             | 163634 | 106 | 2  | 2  | 1  |
| gi 255730273                 | hypothetical protein CTRG_04358 [ <i>Candida tropicalis</i> MYA-3404]               | 84100  | 99  | 2  | 2  | 2  |
| gi 255729062                 | pH-regulated antigen PRA1 precursor [ <i>Candida tropicalis</i> MYA-3404]           | 35235  | 88  | 3  | 2  | 7  |
| gi 255723898                 | conserved hypothetical protein [ <i>Candida tropicalis</i> MYA-3404]                | 65882  | 85  | 1  | 1  | 2  |
| gi 255721021                 | malate dehydrogenase, mitochondrial precursor [ <i>Candida tropicalis</i> MYA-3404] | 34822  | 81  | 3  | 3  | 11 |
| gi 255725240                 | predicted protein [ <i>Candida tropicalis</i> MYA-3404]                             | 66682  | 77  | 3  | 3  | 6  |
| gi 255730537                 | candidapepsin-7 precursor [ <i>Candida tropicalis</i> MYA-3404]                     | 73220  | 73  | 2  | 2  | 3  |
| gi 255725372                 | predicted protein [ <i>Candida tropicalis</i> MYA-3404]                             | 76231  | 68  | 1  | 1  | 1  |
| gi 255725374                 | conserved hypothetical protein [ <i>Candida tropicalis</i> MYA-3404]                | 165466 | 68  | 1  | 1  | 0  |
| gi 255725376                 | conserved hypothetical protein [ <i>Candida tropicalis</i> MYA-3404]                | 83759  | 68  | 1  | 1  | 1  |
| gi 255732093                 | ADP,ATP carrier protein [ <i>Candida tropicalis</i> MYA-3404]                       | 33532  | 57  | 2  | 2  | 7  |
| <b>vesicles sonication 2</b> |                                                                                     |        |     |    |    |    |
| gi 255728723                 | opaque-phase-specific protein OP4 precursor [ <i>Candida tropicalis</i> MYA-3404]   | 43376  | 612 | 13 | 8  | 24 |
| gi 255733002                 | plasma membrane ATPase 1 [ <i>Candida tropicalis</i> MYA-3404]                      | 98358  | 554 | 15 | 14 | 17 |



|              |                                                                             |        |     |    |    |    |
|--------------|-----------------------------------------------------------------------------|--------|-----|----|----|----|
| gi 255729942 | hypothetical protein CTRG_04193 [ <i>Candida tropicalis</i> MYA-3404]       | 120876 | 379 | 12 | 11 | 13 |
| gi 255720907 | glucan 1,3-beta-glucosidase precursor [ <i>Candida tropicalis</i> MYA-3404] | 34181  | 375 | 9  | 9  | 25 |
| gi 255722347 | hypothetical protein CTRG_00890 [ <i>Candida tropicalis</i> MYA-3404]       | 53021  | 297 | 6  | 6  | 15 |
| gi 255731223 | conserved hypothetical protein [ <i>Candida tropicalis</i> MYA-3404]        | 38035  | 287 | 5  | 5  | 13 |
| gi 255729274 | conserved hypothetical protein [ <i>Candida tropicalis</i> MYA-3404]        | 37686  | 260 | 6  | 4  | 15 |
| gi 255727428 | phosphoglycerate kinase [ <i>Candida tropicalis</i> MYA-3404]               | 44686  | 237 | 9  | 9  | 27 |
| gi 255731057 | conserved hypothetical protein [ <i>Candida tropicalis</i> MYA-3404]        | 29766  | 228 | 6  | 6  | 24 |
| gi 255722852 | predicted protein [ <i>Candida tropicalis</i> MYA-3404]                     | 194842 | 162 | 6  | 5  | 4  |
| gi 255732780 | conserved hypothetical protein [ <i>Candida tropicalis</i> MYA-3404]        | 50823  | 162 | 4  | 4  | 12 |
| gi 255730873 | predicted protein [ <i>Candida tropicalis</i> MYA-3404]                     | 23247  | 157 | 4  | 3  | 25 |
| gi 255721523 | predicted protein [ <i>Candida tropicalis</i> MYA-3404]                     | 98965  | 154 | 3  | 3  | 3  |
| gi 255732093 | ADP,ATP carrier protein [ <i>Candida tropicalis</i> MYA-3404]               | 33532  | 150 | 5  | 4  | 15 |
| gi 255725714 | hypothetical protein CTRG_02093 [ <i>Candida tropicalis</i> MYA-3404]       | 39082  | 148 | 3  | 3  | 9  |
| gi 255729820 | conserved hypothetical protein [ <i>Candida tropicalis</i> MYA-3404]        | 35427  | 142 | 3  | 3  | 13 |
| gi 255729832 | conserved hypothetical protein [ <i>Candida tropicalis</i> MYA-3404]        | 21663  | 142 | 3  | 3  | 22 |
| gi 255732521 | alcohol dehydrogenase 2 [ <i>Candida tropicalis</i> MYA-3404]               | 37181  | 130 | 4  | 4  | 12 |
| gi 255727881 | enolase 1 [ <i>Candida tropicalis</i> MYA-3404]                             | 46984  | 128 | 4  | 4  | 13 |
| gi 255725506 | conserved hypothetical protein [ <i>Candida tropicalis</i> MYA-3404]        | 31403  | 97  | 2  | 2  | 8  |
| gi 255721095 | hypothetical protein CTRG_00263 [ <i>Candida tropicalis</i> MYA-3404]       | 49693  | 81  | 2  | 2  | 5  |

|                                                   |                                                                                   |        |     |    |   |    |
|---------------------------------------------------|-----------------------------------------------------------------------------------|--------|-----|----|---|----|
| gi 255729440                                      | protein EPD2 precursor [ <i>Candida tropicalis</i> MYA-3404]                      | 61273  | 77  | 3  | 3 | 7  |
| gi 255730149                                      | protein EPD1 precursor [ <i>Candida tropicalis</i> MYA-3404]                      | 59740  | 71  | 2  | 2 | 4  |
| gi 255728237                                      | predicted protein [ <i>Candida tropicalis</i> MYA-3404]                           | 22931  | 65  | 1  | 1 | 5  |
| gi 255731107                                      | predicted protein [ <i>Candida tropicalis</i> MYA-3404]                           | 48865  | 62  | 1  | 1 | 3  |
| <b>vesicles sonication 3</b>                      |                                                                                   |        |     |    |   |    |
| gi 255725714                                      | hypothetical protein CTRG_02093 [ <i>Candida tropicalis</i> MYA-3404]             | 39082  | 415 | 12 | 9 | 35 |
| gi 255728723                                      | opaque-phase-specific protein OP4 precursor [ <i>Candida tropicalis</i> MYA-3404] | 43376  | 186 | 4  | 4 | 12 |
| gi 255729274                                      | conserved hypothetical protein [ <i>Candida tropicalis</i> MYA-3404]              | 37686  | 160 | 3  | 3 | 9  |
| gi 255722852                                      | predicted protein [ <i>Candida tropicalis</i> MYA-3404]                           | 194842 | 122 | 3  | 3 | 1  |
| gi 255729942                                      | hypothetical protein CTRG_04193 [ <i>Candida tropicalis</i> MYA-3404]             | 120876 | 101 | 4  | 4 | 4  |
| gi 255720907                                      | glucan 1,3-beta-glucosidase precursor [ <i>Candida tropicalis</i> MYA-3404]       | 34181  | 90  | 3  | 3 | 12 |
| gi 255732910                                      | predicted protein [ <i>Candida tropicalis</i> MYA-3404]                           | 77134  | 87  | 3  | 3 | 3  |
| gi 255723898                                      | conserved hypothetical protein [ <i>Candida tropicalis</i> MYA-3404]              | 65882  | 78  | 3  | 2 | 4  |
| gi 255729274                                      | conserved hypothetical protein [ <i>Candida tropicalis</i> MYA-3404]              | 37686  | 72  | 2  | 1 | 3  |
| <b>fraction enriched with membrane proteins 1</b> |                                                                                   |        |     |    |   |    |
| gi 255728723                                      | opaque-phase-specific protein OP4 precursor [ <i>Candida tropicalis</i> MYA-3404] | 43376  | 544 | 11 | 8 | 24 |
| gi 255731223                                      | conserved hypothetical protein [ <i>Candida tropicalis</i> MYA-3404]              | 38035  | 252 | 4  | 3 | 10 |
| gi 255729274                                      | conserved hypothetical protein [ <i>Candida tropicalis</i> MYA-3404]              | 37686  | 209 | 4  | 4 | 9  |

|                                                   |                                                                                   |        |     |    |   |    |
|---------------------------------------------------|-----------------------------------------------------------------------------------|--------|-----|----|---|----|
| gi 255730873                                      | predicted protein [ <i>Candida tropicalis</i> MYA-3404]                           | 23247  | 207 | 6  | 4 | 31 |
| gi 255729942                                      | hypothetical protein CTRG_04193 [ <i>Candida tropicalis</i> MYA-3404]             | 120876 | 200 | 6  | 6 | 6  |
| gi 255727428                                      | phosphoglycerate kinase [ <i>Candida tropicalis</i> MYA-3404]                     | 44686  | 160 | 5  | 5 | 17 |
| gi 255721523                                      | predicted protein [ <i>Candida tropicalis</i> MYA-3404]                           | 98965  | 150 | 4  | 4 | 4  |
| gi 255725930                                      | predicted protein [ <i>Candida tropicalis</i> MYA-3404]                           | 71216  | 131 | 4  | 4 | 6  |
| gi 255733002                                      | plasma membrane ATPase 1 [ <i>Candida tropicalis</i> MYA-3404]                    | 98358  | 124 | 4  | 4 | 4  |
| gi 255732521                                      | alcohol dehydrogenase 2 [ <i>Candida tropicalis</i> MYA-3404]                     | 37181  | 115 | 4  | 4 | 18 |
| gi 255722852                                      | predicted protein [ <i>Candida tropicalis</i> MYA-3404]                           | 194842 | 113 | 3  | 3 | 1  |
| gi 255725506                                      | conserved hypothetical protein [ <i>Candida tropicalis</i> MYA-3404]              | 31403  | 109 | 2  | 2 | 11 |
| gi 255730149                                      | protein EPD1 precursor [ <i>Candida tropicalis</i> MYA-3404]                      | 59740  | 75  | 2  | 2 | 4  |
| <b>fraction enriched with membrane proteins 2</b> |                                                                                   |        |     |    |   |    |
| gi 255728723                                      | opaque-phase-specific protein OP4 precursor [ <i>Candida tropicalis</i> MYA-3404] | 43376  | 391 | 12 | 7 | 18 |
| gi 255729274                                      | conserved hypothetical protein [ <i>Candida tropicalis</i> MYA-3404]              | 37686  | 183 | 5  | 3 | 13 |
| gi 255729820                                      | conserved hypothetical protein [ <i>Candida tropicalis</i> MYA-3404]              | 35427  | 165 | 3  | 3 | 13 |
| gi 255729832                                      | conserved hypothetical protein [ <i>Candida tropicalis</i> MYA-3404]              | 21663  | 165 | 3  | 3 | 22 |
| gi 255731223                                      | conserved hypothetical protein [ <i>Candida tropicalis</i> MYA-3404]              | 38035  | 115 | 3  | 3 | 9  |
| gi 255725506                                      | conserved hypothetical protein [ <i>Candida tropicalis</i> MYA-3404]              | 31403  | 99  | 3  | 2 | 7  |
| gi 255722852                                      | predicted protein [ <i>Candida tropicalis</i> MYA-3404]                           | 194842 | 96  | 3  | 3 | 1  |
| gi 255723032                                      | predicted protein [ <i>Candida tropicalis</i> MYA-3404]                           | 15229  | 84  | 1  | 1 | 8  |
| gi 255732780                                      | conserved hypothetical protein [ <i>Candida tropicalis</i> MYA-3404]              | 50823  | 84  | 1  | 1 | 2  |

|                                                   |                                                                                   |        |     |    |   |    |
|---------------------------------------------------|-----------------------------------------------------------------------------------|--------|-----|----|---|----|
| gi 255732521                                      | alcohol dehydrogenase 2 [ <i>Candida tropicalis</i> MYA-3404]                     | 37181  | 69  | 2  | 2 | 9  |
| <b>fraction enriched with membrane proteins 3</b> |                                                                                   |        |     |    |   |    |
| gi 255728723                                      | opaque-phase-specific protein OP4 precursor [ <i>Candida tropicalis</i> MYA-3404] | 43376  | 474 | 18 | 8 | 21 |
| gi 255729274                                      | conserved hypothetical protein [ <i>Candida tropicalis</i> MYA-3404]              | 37686  | 246 | 8  | 4 | 13 |
| gi 255731223                                      | conserved hypothetical protein [ <i>Candida tropicalis</i> MYA-3404]              | 38035  | 190 | 5  | 3 | 11 |
| gi 255725930                                      | predicted protein [ <i>Candida tropicalis</i> MYA-3404]                           | 71216  | 141 | 5  | 5 | 7  |
| gi 255725506                                      | conserved hypothetical protein [ <i>Candida tropicalis</i> MYA-3404]              | 31403  | 124 | 3  | 2 | 12 |
| gi 255722347                                      | hypothetical protein CTRG_00890 [ <i>Candida tropicalis</i> MYA-3404]             | 53021  | 94  | 2  | 2 | 5  |
| gi 255722371                                      | hypothetical protein CTRG_00902 [ <i>Candida tropicalis</i> MYA-3404]             | 53033  | 94  | 2  | 2 | 5  |
| gi 255732780                                      | conserved hypothetical protein [ <i>Candida tropicalis</i> MYA-3404]              | 50823  | 85  | 2  | 1 | 2  |
| gi 255722852                                      | predicted protein [ <i>Candida tropicalis</i> MYA-3404]                           | 194842 | 82  | 2  | 2 | 0  |
| gi 255722876                                      | predicted protein [ <i>Candida tropicalis</i> MYA-3404]                           | 15870  | 66  | 1  | 1 | 5  |
| <b>fraction enriched with membrane proteins 4</b> |                                                                                   |        |     |    |   |    |
| gi 255728723                                      | opaque-phase-specific protein OP4 precursor [ <i>Candida tropicalis</i> MYA-3404] | 43376  | 462 | 20 | 7 | 20 |
| gi 255731223                                      | conserved hypothetical protein [ <i>Candida tropicalis</i> MYA-3404]              | 38035  | 436 | 9  | 7 | 26 |
| gi 255729274                                      | conserved hypothetical protein [ <i>Candida tropicalis</i> MYA-3404]              | 37686  | 275 | 6  | 4 | 13 |
| gi 255725506                                      | conserved hypothetical protein [ <i>Candida tropicalis</i> MYA-3404]              | 31403  | 102 | 3  | 2 | 12 |
| gi 255722852                                      | predicted protein [ <i>Candida tropicalis</i> MYA-3404]                           | 194842 | 79  | 2  | 2 | 0  |
| gi 255730004                                      | predicted protein [ <i>Candida tropicalis</i> MYA-3404]                           | 95636  | 79  | 2  | 2 | 1  |

|              |                                                                      |       |    |   |   |   |
|--------------|----------------------------------------------------------------------|-------|----|---|---|---|
| gi 255732780 | conserved hypothetical protein [ <i>Candida tropicalis</i> MYA-3404] | 50823 | 71 | 2 | 1 | 2 |
| gi 255728237 | predicted protein [ <i>Candida tropicalis</i> MYA-3404]              | 22931 | 58 | 1 | 1 | 5 |
| gi 255731029 | conserved hypothetical protein [ <i>Candida tropicalis</i> MYA-3404] | 30545 | 54 | 2 | 2 | 5 |
