# Supplementary material for: Characteristics of Extracellular Vesicles Released by the Pathogenic Yeast-Like Fungi Candida glabrata, Candida parapsilosis and Candida tropicalis
Source: MDPI journal article supplement (doi:10.3390/cells9071722), 2020-07-18
Supplement: s1 [file s1]

**Supplementary Table 2.** Mass spectrometry identification of *C. parapsilosis* proteins in EVs after vesicle surface shaving with trypsin, vesicle sonication, or the preparation of fractions enriched with membrane proteins.

The resulting peptides were analyzed using the Dionex Ultimate 3000 UHPLC system coupled to an HCTUltra ETDII mass spectrometer and the obtained lists of peaks were searched against the NCBI protein database using an in-house Mascot server.

| Accession number                      | Protein                                                           | Molecular mass [Da] | Score | Matches | Sequences | Sequence coverage [%] |
|---------------------------------------|-------------------------------------------------------------------|---------------------|-------|---------|-----------|-----------------------|
| <b>surface shaving with trypsin 1</b> |                                                                   |                     |       |         |           |                       |
| gi 354544096                          | hypothetical protein CPAR2_108560 [ <i>Candida parapsilosis</i> ] | 44734               | 434   | 10      | 7         | 19                    |
| gi 354547623                          | hypothetical protein CPAR2_401600 [ <i>Candida parapsilosis</i> ] | 34120               | 398   | 10      | 8         | 22                    |
| gi 354546478                          | hypothetical protein CPAR2_208530 [ <i>Candida parapsilosis</i> ] | 35667               | 327   | 7       | 6         | 26                    |
| gi 354548190                          | hypothetical protein CPAR2_407280 [ <i>Candida parapsilosis</i> ] | 30559               | 270   | 6       | 5         | 30                    |
| gi 354548203                          | hypothetical protein CPAR2_407410 [ <i>Candida parapsilosis</i> ] | 39522               | 258   | 6       | 4         | 12                    |
| gi 354543842                          | hypothetical protein CPAR2_106000 [ <i>Candida parapsilosis</i> ] | 49102               | 256   | 7       | 6         | 21                    |
| gi 354543893                          | hypothetical protein CPAR2_106500 [ <i>Candida parapsilosis</i> ] | 56211               | 245   | 6       | 5         | 12                    |
| gi 354544089                          | hypothetical protein CPAR2_108490 [ <i>Candida parapsilosis</i> ] | 38798               | 199   | 6       | 5         | 17                    |
| gi 354545372                          | hypothetical protein CPAR2_806490 [ <i>Candida parapsilosis</i> ] | 41477               | 190   | 3       | 3         | 7                     |
| gi 354544910                          | hypothetical protein CPAR2_801850 [ <i>Candida parapsilosis</i> ] | 41980               | 182   | 4       | 2         | 9                     |
| gi 354545518                          | hypothetical protein CPAR2_807950 [ <i>Candida parapsilosis</i> ] | 45323               | 163   | 4       | 4         | 11                    |
| gi 354544206                          | hypothetical protein CPAR2_109660 [ <i>Candida parapsilosis</i> ] | 60797               | 137   | 2       | 2         | 4                     |
| gi 354545390                          | hypothetical protein CPAR2_806670 [ <i>Candida parapsilosis</i> ] | 53439               | 129   | 6       | 2         | 5                     |

|                                       |                                                                   |        |     |    |   |    |
|---------------------------------------|-------------------------------------------------------------------|--------|-----|----|---|----|
| gi 354544345                          | hypothetical protein CPAR2_300570 [ <i>Candida parapsilosis</i> ] | 31701  | 114 | 2  | 2 | 7  |
| gi 354543504                          | hypothetical protein CPAR2_102610 [ <i>Candida parapsilosis</i> ] | 64176  | 114 | 2  | 2 | 6  |
| gi 354548052                          | hypothetical protein CPAR2_405910 [ <i>Candida parapsilosis</i> ] | 32870  | 111 | 3  | 3 | 10 |
| gi 354547257                          | hypothetical protein CPAR2_502160 [ <i>Candida parapsilosis</i> ] | 49909  | 101 | 2  | 2 | 5  |
| gi 354547091                          | hypothetical protein CPAR2_500500 [ <i>Candida parapsilosis</i> ] | 36553  | 89  | 1  | 1 | 4  |
| gi 354543976                          | hypothetical protein CPAR2_107330 [ <i>Candida parapsilosis</i> ] | 37592  | 87  | 2  | 2 | 10 |
| gi 354544883                          | hypothetical protein CPAR2_801600 [ <i>Candida parapsilosis</i> ] | 99191  | 65  | 2  | 2 | 2  |
| gi 354545228                          | hypothetical protein CPAR2_805040 [ <i>Candida parapsilosis</i> ] | 23446  | 56  | 1  | 1 | 4  |
| gi 354547939                          | hypothetical protein CPAR2_404780 [ <i>Candida parapsilosis</i> ] | 114085 | 55  | 1  | 1 | 1  |
| gi 354547941                          | hypothetical protein CPAR2_404800 [ <i>Candida parapsilosis</i> ] | 144019 | 55  | 1  | 1 | 1  |
| <b>surface shaving with trypsin 2</b> |                                                                   |        |     |    |   |    |
| gi 354544096                          | hypothetical protein CPAR2_108560 [ <i>Candida parapsilosis</i> ] | 44734  | 541 | 10 | 9 | 22 |
| gi 354547623                          | hypothetical protein CPAR2_401600 [ <i>Candida parapsilosis</i> ] | 34120  | 407 | 10 | 8 | 31 |
| gi 354543893                          | hypothetical protein CPAR2_106500 [ <i>Candida parapsilosis</i> ] | 56211  | 358 | 8  | 7 | 16 |
| gi 354546478                          | hypothetical protein CPAR2_208530 [ <i>Candida parapsilosis</i> ] | 35667  | 351 | 7  | 5 | 21 |
| gi 354543842                          | hypothetical protein CPAR2_106000 [ <i>Candida parapsilosis</i> ] | 49102  | 329 | 7  | 6 | 19 |
| gi 354548190                          | hypothetical protein CPAR2_407280 [ <i>Candida parapsilosis</i> ] | 30559  | 279 | 8  | 5 | 24 |
| gi 354548203                          | hypothetical protein CPAR2_407410 [ <i>Candida parapsilosis</i> ] | 39522  | 197 | 8  | 4 | 9  |
| gi 354543976                          | hypothetical protein CPAR2_107330 [ <i>Candida parapsilosis</i> ] | 37592  | 179 | 3  | 3 | 12 |
| gi 354545372                          | hypothetical protein CPAR2_806490 [ <i>Candida parapsilosis</i> ] | 41477  | 179 | 3  | 3 | 7  |
| gi 354548052                          | hypothetical protein CPAR2_405910 [ <i>Candida parapsilosis</i> ] | 32870  | 168 | 4  | 4 | 11 |

|                                       |                                                                   |        |     |   |   |    |
|---------------------------------------|-------------------------------------------------------------------|--------|-----|---|---|----|
| gi 354547356                          | hypothetical protein CPAR2_503160 [ <i>Candida parapsilosis</i> ] | 51464  | 165 | 4 | 4 | 10 |
| gi 354544206                          | hypothetical protein CPAR2_109660 [ <i>Candida parapsilosis</i> ] | 60797  | 159 | 3 | 3 | 7  |
| gi 354544345                          | hypothetical protein CPAR2_300570 [ <i>Candida parapsilosis</i> ] | 31701  | 151 | 3 | 3 | 9  |
| gi 354543610                          | hypothetical protein CPAR2_103690 [ <i>Candida parapsilosis</i> ] | 60638  | 146 | 3 | 3 | 7  |
| gi 354548638                          | hypothetical protein CPAR2_703880 [ <i>Candida parapsilosis</i> ] | 92640  | 132 | 4 | 4 | 7  |
| gi 354545390                          | hypothetical protein CPAR2_806670 [ <i>Candida parapsilosis</i> ] | 53439  | 131 | 5 | 2 | 5  |
| gi 354547257                          | hypothetical protein CPAR2_502160 [ <i>Candida parapsilosis</i> ] | 49909  | 126 | 2 | 2 | 6  |
| gi 354545228                          | hypothetical protein CPAR2_805040 [ <i>Candida parapsilosis</i> ] | 23446  | 96  | 3 | 2 | 7  |
| gi 354544910                          | hypothetical protein CPAR2_801850 [ <i>Candida parapsilosis</i> ] | 41980  | 89  | 7 | 1 | 3  |
| gi 354547091                          | hypothetical protein CPAR2_500500 [ <i>Candida parapsilosis</i> ] | 36553  | 83  | 1 | 1 | 4  |
| gi 354548067                          | hypothetical protein CPAR2_406060 [ <i>Candida parapsilosis</i> ] | 84922  | 78  | 2 | 2 | 4  |
| gi 354544883                          | hypothetical protein CPAR2_801600 [ <i>Candida parapsilosis</i> ] | 99191  | 75  | 2 | 2 | 2  |
| gi 354543315                          | hypothetical protein CPAR2_100710 [ <i>Candida parapsilosis</i> ] | 47017  | 74  | 1 | 1 | 2  |
| gi 354547549                          | hypothetical protein CPAR2_400860 [ <i>Candida parapsilosis</i> ] | 52009  | 69  | 1 | 1 | 2  |
| gi 354544089                          | hypothetical protein CPAR2_108490 [ <i>Candida parapsilosis</i> ] | 38798  | 65  | 2 | 2 | 5  |
| gi 354546504                          | hypothetical protein CPAR2_208800 [ <i>Candida parapsilosis</i> ] | 35461  | 63  | 1 | 1 | 3  |
| gi 354545518                          | hypothetical protein CPAR2_807950 [ <i>Candida parapsilosis</i> ] | 45323  | 61  | 1 | 1 | 2  |
| gi 354543994                          | hypothetical protein CPAR2_107510 [ <i>Candida parapsilosis</i> ] | 64136  | 58  | 1 | 1 | 2  |
| gi 354548402                          | hypothetical protein CPAR2_701420 [ <i>Candida parapsilosis</i> ] | 125716 | 57  | 1 | 1 | 1  |
| <b>surface shaving with trypsin 3</b> |                                                                   |        |     |   |   |    |
| gi 354547623                          | hypothetical protein CPAR2_401600 [ <i>Candida parapsilosis</i> ] | 34120  | 347 | 7 | 6 | 17 |

|                                       |                                                                   |       |     |    |   |    |
|---------------------------------------|-------------------------------------------------------------------|-------|-----|----|---|----|
| gi 354546478                          | hypothetical protein CPAR2_208530 [ <i>Candida parapsilosis</i> ] | 35667 | 334 | 5  | 5 | 22 |
| gi 354548203                          | hypothetical protein CPAR2_407410 [ <i>Candida parapsilosis</i> ] | 39522 | 243 | 5  | 4 | 12 |
| gi 354543842                          | hypothetical protein CPAR2_106000 [ <i>Candida parapsilosis</i> ] | 49102 | 232 | 5  | 5 | 12 |
| gi 354543893                          | hypothetical protein CPAR2_106500 [ <i>Candida parapsilosis</i> ] | 56211 | 231 | 4  | 4 | 10 |
| gi 354545372                          | hypothetical protein CPAR2_806490 [ <i>Candida parapsilosis</i> ] | 41477 | 177 | 3  | 3 | 7  |
| gi 354548052                          | hypothetical protein CPAR2_405910 [ <i>Candida parapsilosis</i> ] | 32870 | 135 | 4  | 4 | 12 |
| gi 354548190                          | hypothetical protein CPAR2_407280 [ <i>Candida parapsilosis</i> ] | 30559 | 132 | 3  | 3 | 8  |
| gi 354544089                          | hypothetical protein CPAR2_108490 [ <i>Candida parapsilosis</i> ] | 38798 | 126 | 5  | 4 | 13 |
| gi 354545390                          | hypothetical protein CPAR2_806670 [ <i>Candida parapsilosis</i> ] | 53439 | 126 | 3  | 2 | 5  |
| gi 354544910                          | hypothetical protein CPAR2_801850 [ <i>Candida parapsilosis</i> ] | 41980 | 122 | 4  | 2 | 9  |
| gi 354544345                          | hypothetical protein CPAR2_300570 [ <i>Candida parapsilosis</i> ] | 31701 | 107 | 3  | 3 | 12 |
| gi 354543610                          | hypothetical protein CPAR2_103690 [ <i>Candida parapsilosis</i> ] | 60638 | 105 | 3  | 2 | 6  |
| gi 354548638                          | hypothetical protein CPAR2_703880 [ <i>Candida parapsilosis</i> ] | 92640 | 85  | 2  | 2 | 2  |
| gi 354544096                          | hypothetical protein CPAR2_108560 [ <i>Candida parapsilosis</i> ] | 44734 | 83  | 2  | 2 | 6  |
| gi 354544206                          | hypothetical protein CPAR2_109660 [ <i>Candida parapsilosis</i> ] | 60797 | 64  | 1  | 1 | 1  |
| gi 354545518                          | hypothetical protein CPAR2_807950 [ <i>Candida parapsilosis</i> ] | 45323 | 60  | 1  | 1 | 2  |
| gi 354543994                          | hypothetical protein CPAR2_107510 [ <i>Candida parapsilosis</i> ] | 64136 | 59  | 1  | 1 | 1  |
| gi 354545228                          | hypothetical protein CPAR2_805040 [ <i>Candida parapsilosis</i> ] | 23446 | 56  | 1  | 1 | 4  |
| <b>surface shaving with trypsin 4</b> |                                                                   |       |     |    |   |    |
| gi 354547623                          | hypothetical protein CPAR2_401600 [ <i>Candida parapsilosis</i> ] | 34120 | 373 | 10 | 7 | 22 |
| gi 354543893                          | hypothetical protein CPAR2_106500 [ <i>Candida parapsilosis</i> ] | 56211 | 291 | 7  | 6 | 15 |

|                              |                                                                   |        |     |    |    |    |
|------------------------------|-------------------------------------------------------------------|--------|-----|----|----|----|
| gi 354543842                 | hypothetical protein CPAR2_106000 [ <i>Candida parapsilosis</i> ] | 49102  | 284 | 8  | 6  | 16 |
| gi 354548203                 | hypothetical protein CPAR2_407410 [ <i>Candida parapsilosis</i> ] | 39522  | 209 | 5  | 4  | 12 |
| gi 354548052                 | hypothetical protein CPAR2_405910 [ <i>Candida parapsilosis</i> ] | 32870  | 111 | 2  | 2  | 6  |
| gi 354546478                 | hypothetical protein CPAR2_208530 [ <i>Candida parapsilosis</i> ] | 35667  | 110 | 3  | 3  | 12 |
| gi 354548511                 | hypothetical protein CPAR2_702600 [ <i>Candida parapsilosis</i> ] | 28538  | 110 | 5  | 3  | 14 |
| gi 354548638                 | hypothetical protein CPAR2_703880 [ <i>Candida parapsilosis</i> ] | 92640  | 106 | 3  | 3  | 4  |
| gi 354544883                 | hypothetical protein CPAR2_801600 [ <i>Candida parapsilosis</i> ] | 99191  | 104 | 3  | 3  | 3  |
| gi 354544345                 | hypothetical protein CPAR2_300570 [ <i>Candida parapsilosis</i> ] | 31701  | 84  | 2  | 2  | 7  |
| gi 354548190                 | hypothetical protein CPAR2_407280 [ <i>Candida parapsilosis</i> ] | 30559  | 81  | 2  | 2  | 10 |
| gi 354544804                 | hypothetical protein CPAR2_800810 [ <i>Candida parapsilosis</i> ] | 52103  | 68  | 4  | 4  | 10 |
| gi 354545590                 | hypothetical protein CPAR2_808670 [ <i>Candida parapsilosis</i> ] | 36264  | 63  | 2  | 2  | 5  |
| gi 354544910                 | hypothetical protein CPAR2_801850 [ <i>Candida parapsilosis</i> ] | 41980  | 54  | 1  | 1  | 3  |
| gi 354546348                 | hypothetical protein CPAR2_207210 [ <i>Candida parapsilosis</i> ] | 46995  | 53  | 1  | 1  | 3  |
| <b>vesicles sonication 1</b> |                                                                   |        |     |    |    |    |
| gi 354544127                 | hypothetical protein CPAR2_108890 [ <i>Candida parapsilosis</i> ] | 118910 | 583 | 16 | 13 | 14 |
| gi 354548203                 | hypothetical protein CPAR2_407410 [ <i>Candida parapsilosis</i> ] | 39522  | 459 | 8  | 8  | 26 |
| gi 354547623                 | hypothetical protein CPAR2_401600 [ <i>Candida parapsilosis</i> ] | 34120  | 419 | 11 | 8  | 25 |
| gi 354548190                 | hypothetical protein CPAR2_407280 [ <i>Candida parapsilosis</i> ] | 30559  | 350 | 13 | 7  | 30 |
| gi 354547091                 | hypothetical protein CPAR2_500500 [ <i>Candida parapsilosis</i> ] | 36553  | 253 | 6  | 3  | 11 |
| gi 354543976                 | hypothetical protein CPAR2_107330 [ <i>Candida parapsilosis</i> ] | 37592  | 232 | 4  | 4  | 16 |
| gi 354547178                 | hypothetical protein CPAR2_501380 [ <i>Candida parapsilosis</i> ] | 49439  | 230 | 7  | 7  | 18 |

|                              |                                                                   |        |     |    |    |    |
|------------------------------|-------------------------------------------------------------------|--------|-----|----|----|----|
| gi 354547255                 | hypothetical protein CPAR2_502140 [ <i>Candida parapsilosis</i> ] | 61228  | 221 | 5  | 3  | 7  |
| gi 354545228                 | hypothetical protein CPAR2_805040 [ <i>Candida parapsilosis</i> ] | 23446  | 220 | 6  | 3  | 13 |
| gi 354543255                 | hypothetical protein CPAR2_100110 [ <i>Candida parapsilosis</i> ] | 50537  | 214 | 7  | 5  | 17 |
| gi 354544501                 | hypothetical protein CPAR2_302140 [ <i>Candida parapsilosis</i> ] | 60168  | 214 | 5  | 5  | 10 |
| gi 354544096                 | hypothetical protein CPAR2_108560 [ <i>Candida parapsilosis</i> ] | 44734  | 164 | 4  | 4  | 8  |
| gi 354544206                 | hypothetical protein CPAR2_109660 [ <i>Candida parapsilosis</i> ] | 60797  | 162 | 4  | 3  | 7  |
| gi 354545518                 | hypothetical protein CPAR2_807950 [ <i>Candida parapsilosis</i> ] | 45323  | 151 | 3  | 3  | 8  |
| gi 354543893                 | hypothetical protein CPAR2_106500 [ <i>Candida parapsilosis</i> ] | 56211  | 135 | 3  | 3  | 5  |
| gi 354543404                 | hypothetical protein CPAR2_101610 [ <i>Candida parapsilosis</i> ] | 57858  | 134 | 5  | 4  | 9  |
| gi 354545390                 | hypothetical protein CPAR2_806670 [ <i>Candida parapsilosis</i> ] | 53439  | 131 | 5  | 2  | 5  |
| gi 354544910                 | hypothetical protein CPAR2_801850 [ <i>Candida parapsilosis</i> ] | 41980  | 115 | 2  | 1  | 3  |
| gi 354544403                 | hypothetical protein CPAR2_301150 [ <i>Candida parapsilosis</i> ] | 32011  | 109 | 4  | 4  | 24 |
| gi 354544345                 | hypothetical protein CPAR2_300570 [ <i>Candida parapsilosis</i> ] | 31701  | 92  | 3  | 3  | 12 |
| gi 354545372                 | hypothetical protein CPAR2_806490 [ <i>Candida parapsilosis</i> ] | 41477  | 88  | 2  | 2  | 4  |
| gi 21953342                  | lipase 2 [ <i>Candida parapsilosis</i> ]                          | 51104  | 80  | 4  | 4  | 11 |
| gi 354547299                 | hypothetical protein CPAR2_502580 [ <i>Candida parapsilosis</i> ] | 43513  | 80  | 3  | 3  | 8  |
| gi 354548325                 | hypothetical protein CPAR2_700650 [ <i>Candida parapsilosis</i> ] | 34248  | 75  | 2  | 2  | 6  |
| gi 354547664                 | hypothetical protein CPAR2_402000 [ <i>Candida parapsilosis</i> ] | 29933  | 56  | 2  | 2  | 8  |
| gi 354547939                 | hypothetical protein CPAR2_404780 [ <i>Candida parapsilosis</i> ] | 114085 | 54  | 2  | 1  | 1  |
| <b>vesicles sonication 2</b> |                                                                   |        |     |    |    |    |
| gi 354544127                 | hypothetical protein CPAR2_108890 [ <i>Candida parapsilosis</i> ] | 118910 | 583 | 13 | 12 | 12 |

|                              |                                                                   |        |     |    |    |    |
|------------------------------|-------------------------------------------------------------------|--------|-----|----|----|----|
| gi 354547623                 | hypothetical protein CPAR2_401600 [ <i>Candida parapsilosis</i> ] | 34120  | 451 | 10 | 9  | 26 |
| gi 354548203                 | hypothetical protein CPAR2_407410 [ <i>Candida parapsilosis</i> ] | 39522  | 327 | 6  | 5  | 17 |
| gi 354547255                 | hypothetical protein CPAR2_502140 [ <i>Candida parapsilosis</i> ] | 61228  | 296 | 7  | 4  | 10 |
| gi 354548190                 | hypothetical protein CPAR2_407280 [ <i>Candida parapsilosis</i> ] | 30559  | 279 | 7  | 4  | 22 |
| gi 354547091                 | hypothetical protein CPAR2_500500 [ <i>Candida parapsilosis</i> ] | 36553  | 265 | 6  | 3  | 11 |
| gi 354547257                 | hypothetical protein CPAR2_502160 [ <i>Candida parapsilosis</i> ] | 49909  | 241 | 7  | 6  | 21 |
| gi 354544206                 | hypothetical protein CPAR2_109660 [ <i>Candida parapsilosis</i> ] | 60797  | 204 | 5  | 5  | 11 |
| gi 354543976                 | hypothetical protein CPAR2_107330 [ <i>Candida parapsilosis</i> ] | 37592  | 192 | 4  | 3  | 12 |
| gi 354545518                 | hypothetical protein CPAR2_807950 [ <i>Candida parapsilosis</i> ] | 45323  | 182 | 3  | 3  | 8  |
| gi 354543893                 | hypothetical protein CPAR2_106500 [ <i>Candida parapsilosis</i> ] | 56211  | 177 | 7  | 5  | 11 |
| gi 354545228                 | hypothetical protein CPAR2_805040 [ <i>Candida parapsilosis</i> ] | 23446  | 166 | 4  | 3  | 13 |
| gi 354545390                 | hypothetical protein CPAR2_806670 [ <i>Candida parapsilosis</i> ] | 53439  | 150 | 7  | 2  | 5  |
| gi 354548325                 | hypothetical protein CPAR2_700650 [ <i>Candida parapsilosis</i> ] | 34248  | 142 | 3  | 3  | 11 |
| gi 354543255                 | hypothetical protein CPAR2_100110 [ <i>Candida parapsilosis</i> ] | 50537  | 105 | 3  | 3  | 10 |
| gi 354544403                 | hypothetical protein CPAR2_301150 [ <i>Candida parapsilosis</i> ] | 32011  | 90  | 4  | 4  | 13 |
| gi 354544910                 | hypothetical protein CPAR2_801850 [ <i>Candida parapsilosis</i> ] | 41980  | 87  | 5  | 1  | 3  |
| gi 354543610                 | hypothetical protein CPAR2_103690 [ <i>Candida parapsilosis</i> ] | 60638  | 59  | 2  | 2  | 4  |
| <b>vesicles sonication 3</b> |                                                                   |        |     |    |    |    |
| gi 354544804                 | hypothetical protein CPAR2_800810 [ <i>Candida parapsilosis</i> ] | 52103  | 754 | 17 | 13 | 34 |
| gi 354544127                 | hypothetical protein CPAR2_108890 [ <i>Candida parapsilosis</i> ] | 118910 | 662 | 12 | 12 | 12 |
| gi 354547623                 | hypothetical protein CPAR2_401600 [ <i>Candida parapsilosis</i> ] | 34120  | 655 | 15 | 11 | 31 |

|              |                                                                    |       |     |    |   |    |
|--------------|--------------------------------------------------------------------|-------|-----|----|---|----|
| gi 354548190 | hypothetical protein CPAR2_407280 [ <i>Candida parapsilosis</i> ]  | 30559 | 583 | 18 | 9 | 40 |
| gi 354548203 | hypothetical protein CPAR2_407410 [ <i>Candida parapsilosis</i> ]  | 39522 | 521 | 9  | 7 | 26 |
| gi 354544096 | hypothetical protein CPAR2_108560 [ <i>Candida parapsilosis</i> ]  | 44734 | 493 | 9  | 8 | 19 |
| gi 354546478 | hypothetical protein CPAR2_208530 [ <i>Candida parapsilosis</i> ]  | 35667 | 462 | 10 | 8 | 31 |
| gi 354544206 | hypothetical protein CPAR2_109660 [ <i>Candida parapsilosis</i> ]  | 60797 | 455 | 8  | 7 | 14 |
| gi 354543842 | hypothetical protein CPAR2_106000 [ <i>Candida parapsilosis</i> ]  | 49102 | 454 | 11 | 9 | 30 |
| gi 354547255 | hypothetical protein CPAR2_502140 [ <i>Candida parapsilosis</i> ]  | 61228 | 371 | 8  | 5 | 10 |
| gi 354543255 | hypothetical protein CPAR2_100110 [ <i>Candida parapsilosis</i> ]  | 50537 | 334 | 7  | 6 | 20 |
| gi 354547257 | hypothetical protein CPAR2_502160 [ <i>Candida parapsilosis</i> ]  | 49909 | 333 | 7  | 5 | 13 |
| gi 354543976 | hypothetical protein CPAR2_107330 [ <i>Candida parapsilosis</i> ]  | 37592 | 325 | 6  | 5 | 20 |
| gi 354543893 | hypothetical protein CPAR2_106500 [ <i>Candida parapsilosis</i> ]  | 56211 | 316 | 7  | 5 | 10 |
| gi 354545518 | hypothetical protein CPAR2_807950 [ <i>Candida parapsilosis</i> ]  | 45323 | 285 | 6  | 5 | 21 |
| gi 354545372 | hypothetical protein CPAR2_806490 [ <i>Candida parapsilosis</i> ]  | 41477 | 272 | 4  | 4 | 9  |
| gi 354544501 | hypothetical protein CPAR2_302140 [ <i>Candida parapsilosis</i> ]  | 60168 | 259 | 5  | 5 | 10 |
| gi 354544089 | hypothetical protein CPAR2_108490 [ <i>Candida parapsilosis</i> ]  | 38798 | 245 | 6  | 6 | 17 |
| gi 354547091 | hypothetical protein CPAR2_500500 [ <i>Candida parapsilosis</i> ]  | 36553 | 244 | 9  | 3 | 11 |
| gi 354548638 | hypothetical protein CPAR2_703880 [ <i>Candida parapsilosis</i> ]  | 92640 | 214 | 7  | 7 | 8  |
| gi 354543504 | hypothetical protein CPAR2_102610 [ <i>Candida parapsilosis</i> ]: | 64176 | 213 | 5  | 4 | 7  |
| gi 354545228 | hypothetical protein CPAR2_805040 [ <i>Candida parapsilosis</i> ]  | 23446 | 201 | 5  | 3 | 13 |
| gi 354546348 | hypothetical protein CPAR2_207210 [ <i>Candida parapsilosis</i> ]  | 46995 | 192 | 4  | 4 | 12 |
| gi 354548052 | hypothetical protein CPAR2_405910 [ <i>Candida parapsilosis</i> ]  | 32870 | 188 | 4  | 4 | 13 |



|              |                                                                    |       |     |   |   |    |
|--------------|--------------------------------------------------------------------|-------|-----|---|---|----|
| gi 354548325 | hypothetical protein CPAR2_700650 [ <i>Candida parapsilosis</i> ]  | 34248 | 173 | 3 | 3 | 12 |
| gi 354545390 | hypothetical protein CPAR2_806670 [ <i>Candida parapsilosis</i> ]  | 53439 | 167 | 7 | 2 | 5  |
| gi 354544345 | hypothetical protein CPAR2_300570 [ <i>Candida parapsilosis</i> ]  | 31701 | 166 | 4 | 4 | 14 |
| gi 354544418 | hypothetical protein CPAR2_301300 [ <i>Candida parapsilosis</i> ]: | 44831 | 160 | 4 | 4 | 10 |
| gi 354547664 | hypothetical protein CPAR2_402000 [ <i>Candida parapsilosis</i> ]  | 29933 | 147 | 4 | 4 | 15 |
| gi 354547665 | hypothetical protein CPAR2_402010 [ <i>Candida parapsilosis</i> ]  | 28561 | 147 | 4 | 4 | 16 |
| gi 21953342  | lipase 2 [ <i>Candida parapsilosis</i> ]                           | 51104 | 147 | 4 | 4 | 9  |
| gi 354548185 | hypothetical protein CPAR2_407230 [ <i>Candida parapsilosis</i> ]  | 30718 | 143 | 6 | 3 | 9  |
| gi 354548441 | hypothetical protein CPAR2_701890 [ <i>Candida parapsilosis</i> ]  | 41314 | 142 | 4 | 4 | 11 |
| gi 354546504 | hypothetical protein CPAR2_208800 [ <i>Candida parapsilosis</i> ]  | 35461 | 142 | 2 | 2 | 8  |
| gi 354547299 | hypothetical protein CPAR2_502580 [ <i>Candida parapsilosis</i> ]  | 43513 | 141 | 3 | 3 | 7  |
| gi 380005457 | carbonyl reductase CPCR1 [ <i>Candida parapsilosis</i> ]           | 37536 | 141 | 3 | 3 | 9  |
| gi 354545695 | hypothetical protein CPAR2_200660 [ <i>Candida parapsilosis</i> ]  | 52061 | 140 | 3 | 3 | 6  |
| gi 354547406 | hypothetical protein CPAR2_503650 [ <i>Candida parapsilosis</i> ]  | 47288 | 136 | 2 | 2 | 6  |
| gi 354544403 | hypothetical protein CPAR2_301150 [ <i>Candida parapsilosis</i> ]  | 32011 | 129 | 4 | 4 | 19 |
| gi 354543994 | hypothetical protein CPAR2_107510 [ <i>Candida parapsilosis</i> ]  | 64136 | 125 | 4 | 4 | 6  |
| gi 354544910 | hypothetical protein CPAR2_801850 [ <i>Candida parapsilosis</i> ]  | 41980 | 119 | 8 | 1 | 3  |
| gi 354543404 | hypothetical protein CPAR2_101610 [ <i>Candida parapsilosis</i> ]  | 57858 | 109 | 3 | 3 | 7  |
| gi 354545615 | hypothetical protein CPAR2_808920 [ <i>Candida parapsilosis</i> ]  | 94691 | 103 | 2 | 2 | 2  |
| gi 354543172 | hypothetical protein CPAR2_603090 [ <i>Candida parapsilosis</i> ]  | 45622 | 93  | 3 | 3 | 10 |
| gi 354545285 | hypothetical protein CPAR2_805610 [ <i>Candida parapsilosis</i> ]  | 29776 | 89  | 2 | 2 | 8  |

|                                                   |                                                                   |        |     |   |   |    |
|---------------------------------------------------|-------------------------------------------------------------------|--------|-----|---|---|----|
| gi 354547356                                      | hypothetical protein CPAR2_503160 [ <i>Candida parapsilosis</i> ] | 51464  | 82  | 2 | 2 | 6  |
| gi 354547058                                      | hypothetical protein CPAR2_500170 [ <i>Candida parapsilosis</i> ] | 68788  | 80  | 2 | 2 | 2  |
| gi 354543610                                      | hypothetical protein CPAR2_103690 [ <i>Candida parapsilosis</i> ] | 60638  | 79  | 2 | 2 | 4  |
| gi 354543681                                      | hypothetical protein CPAR2_104380 [ <i>Candida parapsilosis</i> ] | 31394  | 76  | 3 | 3 | 13 |
| gi 354548067                                      | hypothetical protein CPAR2_406060 [ <i>Candida parapsilosis</i> ] | 84922  | 70  | 3 | 3 | 5  |
| gi 354547340                                      | hypothetical protein CPAR2_502990 [ <i>Candida parapsilosis</i> ] | 27451  | 65  | 2 | 2 | 8  |
| gi 354547940                                      | hypothetical protein CPAR2_404790 [ <i>Candida parapsilosis</i> ] | 250245 | 58  | 1 | 1 | 0  |
| gi 354547821                                      | hypothetical protein CPAR2_403590 [ <i>Candida parapsilosis</i> ] | 56088  | 55  | 2 | 2 | 3  |
| <b>fraction enriched with membrane proteins 1</b> |                                                                   |        |     |   |   |    |
| gi 354547623                                      | hypothetical protein CPAR2_401600 [ <i>Candida parapsilosis</i> ] | 34120  | 207 | 5 | 4 | 14 |
| gi 354548203                                      | hypothetical protein CPAR2_407410 [ <i>Candida parapsilosis</i> ] | 39522  | 198 | 4 | 3 | 11 |
| gi 354547091                                      | hypothetical protein CPAR2_500500 [ <i>Candida parapsilosis</i> ] | 36553  | 144 | 4 | 2 | 7  |
| gi 354548190                                      | hypothetical protein CPAR2_407280 [ <i>Candida parapsilosis</i> ] | 30559  | 137 | 3 | 3 | 14 |
| gi 354545390                                      | hypothetical protein CPAR2_806670 [ <i>Candida parapsilosis</i> ] | 53439  | 137 | 4 | 2 | 5  |
| gi 354543976                                      | hypothetical protein CPAR2_107330 [ <i>Candida parapsilosis</i> ] | 37592  | 106 | 3 | 2 | 7  |
| gi 354543893                                      | hypothetical protein CPAR2_106500 [ <i>Candida parapsilosis</i> ] | 56211  | 105 | 3 | 3 | 6  |
| gi 354545228                                      | hypothetical protein CPAR2_805040 [ <i>Candida parapsilosis</i> ] | 23446  | 104 | 2 | 2 | 7  |
| gi 354545372                                      | hypothetical protein CPAR2_806490 [ <i>Candida parapsilosis</i> ] | 41477  | 84  | 2 | 2 | 5  |
| gi 354545518                                      | hypothetical protein CPAR2_807950 [ <i>Candida parapsilosis</i> ] | 45323  | 78  | 2 | 2 | 5  |
| gi 354544096                                      | hypothetical protein CPAR2_108560 [ <i>Candida parapsilosis</i> ] | 44734  | 74  | 3 | 3 | 6  |
| gi 354544910                                      | hypothetical protein CPAR2_801850 [ <i>Candida parapsilosis</i> ] | 41980  | 62  | 1 | 1 | 3  |

| fraction enriched with membrane proteins 2 |                                                                   |       |     |    |   |    |
|--------------------------------------------|-------------------------------------------------------------------|-------|-----|----|---|----|
| gi 354548190                               | hypothetical protein CPAR2_407280 [ <i>Candida parapsilosis</i> ] | 30559 | 424 | 13 | 8 | 32 |
| gi 354548203                               | hypothetical protein CPAR2_407410 [ <i>Candida parapsilosis</i> ] | 39522 | 259 | 5  | 5 | 17 |
| gi 354547623                               | hypothetical protein CPAR2_401600 [ <i>Candida parapsilosis</i> ] | 34120 | 235 | 6  | 5 | 16 |
| gi 354545518                               | hypothetical protein CPAR2_807950 [ <i>Candida parapsilosis</i> ] | 45323 | 217 | 4  | 4 | 8  |
| gi 354544910                               | hypothetical protein CPAR2_801850 [ <i>Candida parapsilosis</i> ] | 41980 | 216 | 8  | 3 | 11 |
| gi 354543893                               | hypothetical protein CPAR2_106500 [ <i>Candida parapsilosis</i> ] | 56211 | 211 | 5  | 4 | 9  |
| gi 354543842                               | hypothetical protein CPAR2_106000 [ <i>Candida parapsilosis</i> ] | 49102 | 160 | 4  | 4 | 11 |
| gi 354545390                               | hypothetical protein CPAR2_806670 [ <i>Candida parapsilosis</i> ] | 53439 | 131 | 4  | 2 | 5  |
| gi 354544403                               | hypothetical protein CPAR2_301150 [ <i>Candida parapsilosis</i> ] | 32011 | 129 | 4  | 3 | 15 |
| gi 354544096                               | hypothetical protein CPAR2_108560 [ <i>Candida parapsilosis</i> ] | 44734 | 118 | 5  | 3 | 9  |
| gi 354545228                               | hypothetical protein CPAR2_805040 [ <i>Candida parapsilosis</i> ] | 23446 | 100 | 2  | 2 | 7  |
| gi 354546478                               | hypothetical protein CPAR2_208530 [ <i>Candida parapsilosis</i> ] | 35667 | 96  | 2  | 2 | 8  |
| gi 354546810                               | hypothetical protein CPAR2_211860 [ <i>Candida parapsilosis</i> ] | 58004 | 88  | 2  | 2 | 2  |
| gi 354548052                               | hypothetical protein CPAR2_405910 [ <i>Candida parapsilosis</i> ] | 32870 | 68  | 3  | 3 | 9  |
| gi 354546504                               | hypothetical protein CPAR2_208800 [ <i>Candida parapsilosis</i> ] | 35461 | 62  | 1  | 1 | 3  |
| gi 354544883                               | hypothetical protein CPAR2_801600 [ <i>Candida parapsilosis</i> ] | 99191 | 59  | 1  | 1 | 1  |
| gi 354548638                               | hypothetical protein CPAR2_703880 [ <i>Candida parapsilosis</i> ] | 92640 | 56  | 1  | 1 | 1  |
| fraction enriched with membrane proteins 3 |                                                                   |       |     |    |   |    |
| gi 354547623                               | hypothetical protein CPAR2_401600 [ <i>Candida parapsilosis</i> ] | 34120 | 255 | 6  | 5 | 15 |
| gi 354543976                               | hypothetical protein CPAR2_107330 [ <i>Candida parapsilosis</i> ] | 37592 | 247 | 7  | 5 | 17 |

|              |                                                                   |       |     |   |   |    |
|--------------|-------------------------------------------------------------------|-------|-----|---|---|----|
| gi 354548190 | hypothetical protein CPAR2_407280 [ <i>Candida parapsilosis</i> ] | 30559 | 244 | 8 | 7 | 38 |
| gi 354546478 | hypothetical protein CPAR2_208530 [ <i>Candida parapsilosis</i> ] | 35667 | 213 | 4 | 4 | 17 |
| gi 354548203 | hypothetical protein CPAR2_407410 [ <i>Candida parapsilosis</i> ] | 39522 | 181 | 5 | 4 | 12 |
| gi 354545390 | hypothetical protein CPAR2_806670 [ <i>Candida parapsilosis</i> ] | 53439 | 148 | 2 | 2 | 5  |
| gi 354544910 | hypothetical protein CPAR2_801850 [ <i>Candida parapsilosis</i> ] | 41980 | 136 | 3 | 2 | 5  |
| gi 354547091 | hypothetical protein CPAR2_500500 [ <i>Candida parapsilosis</i> ] | 36553 | 135 | 3 | 2 | 7  |
| gi 354548052 | hypothetical protein CPAR2_405910 [ <i>Candida parapsilosis</i> ] | 32870 | 121 | 3 | 3 | 10 |
| gi 354543893 | hypothetical protein CPAR2_106500 [ <i>Candida parapsilosis</i> ] | 56211 | 120 | 3 | 2 | 5  |
| gi 354543610 | hypothetical protein CPAR2_103690 [ <i>Candida parapsilosis</i> ] | 60638 | 118 | 3 | 2 | 6  |
| gi 354545518 | hypothetical protein CPAR2_807950 [ <i>Candida parapsilosis</i> ] | 45323 | 102 | 2 | 2 | 5  |
| gi 354546810 | hypothetical protein CPAR2_211860 [ <i>Candida parapsilosis</i> ] | 58004 | 98  | 3 | 2 | 2  |
| gi 354544089 | hypothetical protein CPAR2_108490 [ <i>Candida parapsilosis</i> ] | 38798 | 55  | 2 | 2 | 11 |
| gi 354544403 | hypothetical protein CPAR2_301150 [ <i>Candida parapsilosis</i> ] | 32011 | 53  | 1 | 1 | 6  |
